# Supplementary material for: Engineering an iron atom-cluster nanostructure towards efficient and durable electrocatalysis
Source: Royal Society of Chemistry journal article supplement (doi:10.1039/d3ta00232b), 2023-01-01
Supplement: d3ta00232b1.pdf [file d3ta00232b1.pdf]

## Supporting Information

### **Engineering iron atom-cluster nanostructure towards efficient and durable electrocatalysis**

Feng-Yi Zheng <sup>a</sup>, Ruisong Li <sup>b</sup>, Shibo Xi <sup>c</sup>, Fei Ai <sup>a</sup>, Jike Wang <sup>a,\*</sup>

<sup>a</sup> *The Institute for Advanced Studies, Wuhan University, Hubei 430072, P. R. China*

<sup>b</sup> *State Key Laboratory of Marine Resource Utilization in South China Sea, Hainan Provincial Key Lab of Fine Chemistry, School of Chemical Engineering and Technology, Hainan University, Haikou 570228, P. R. China*

<sup>c</sup> *Institute of Chemical and Engineering Sciences, A\*STAR (Agency for Science, Technology and Research), Singapore 627833, Singapore*

**\*Corresponding author:** *Jike.Wang@whu.edu.cn (J. Wang)*

## **Table of contents**

**Section 1. Supporting Figures and Tables**

**Section 2. References**

## Section 1. Supporting Figures and Tables

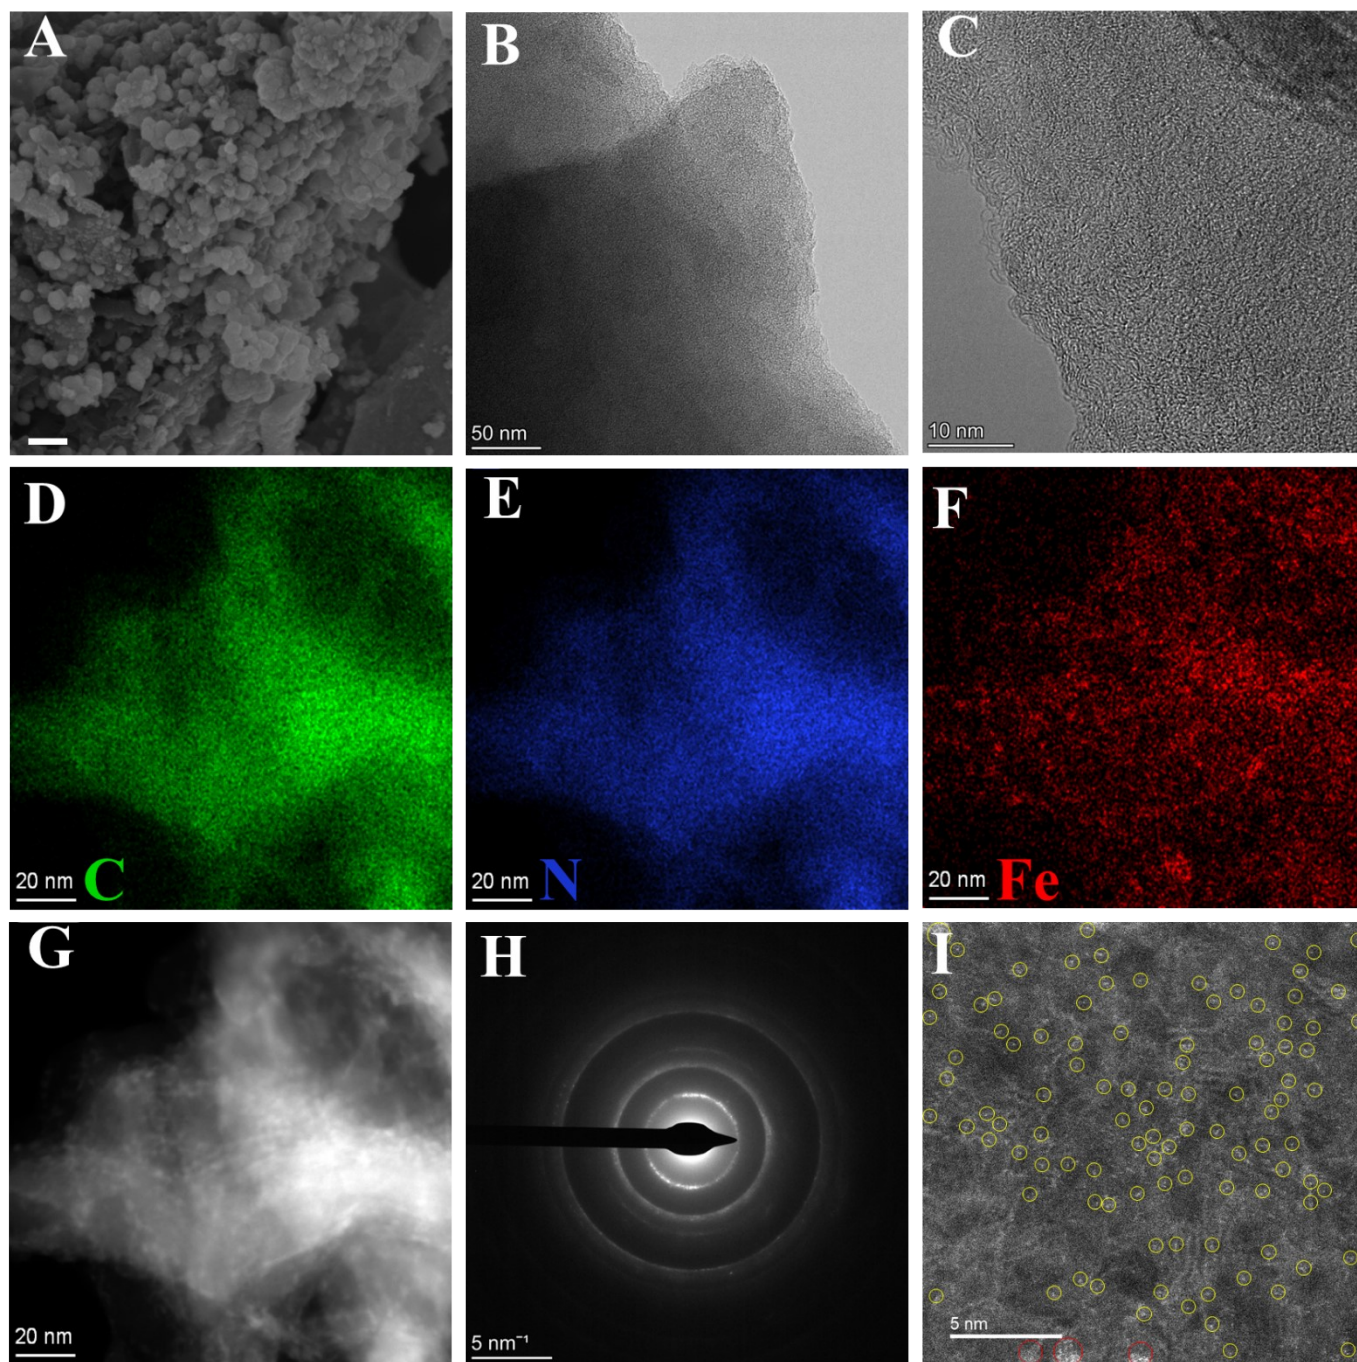

**Fig. S1** A) SEM, B) TEM, C) HRTEM, G) HAADF-STEM and corresponding elemental mapping images of D) C, E) N and F) Fe elements, H) SAED, and I) aberration-corrected HAADF-STEM image (yellow circles: single atoms; red circles: clusters) of Fe<sub>SA</sub>/Fe<sub>AC</sub>-NC 800.

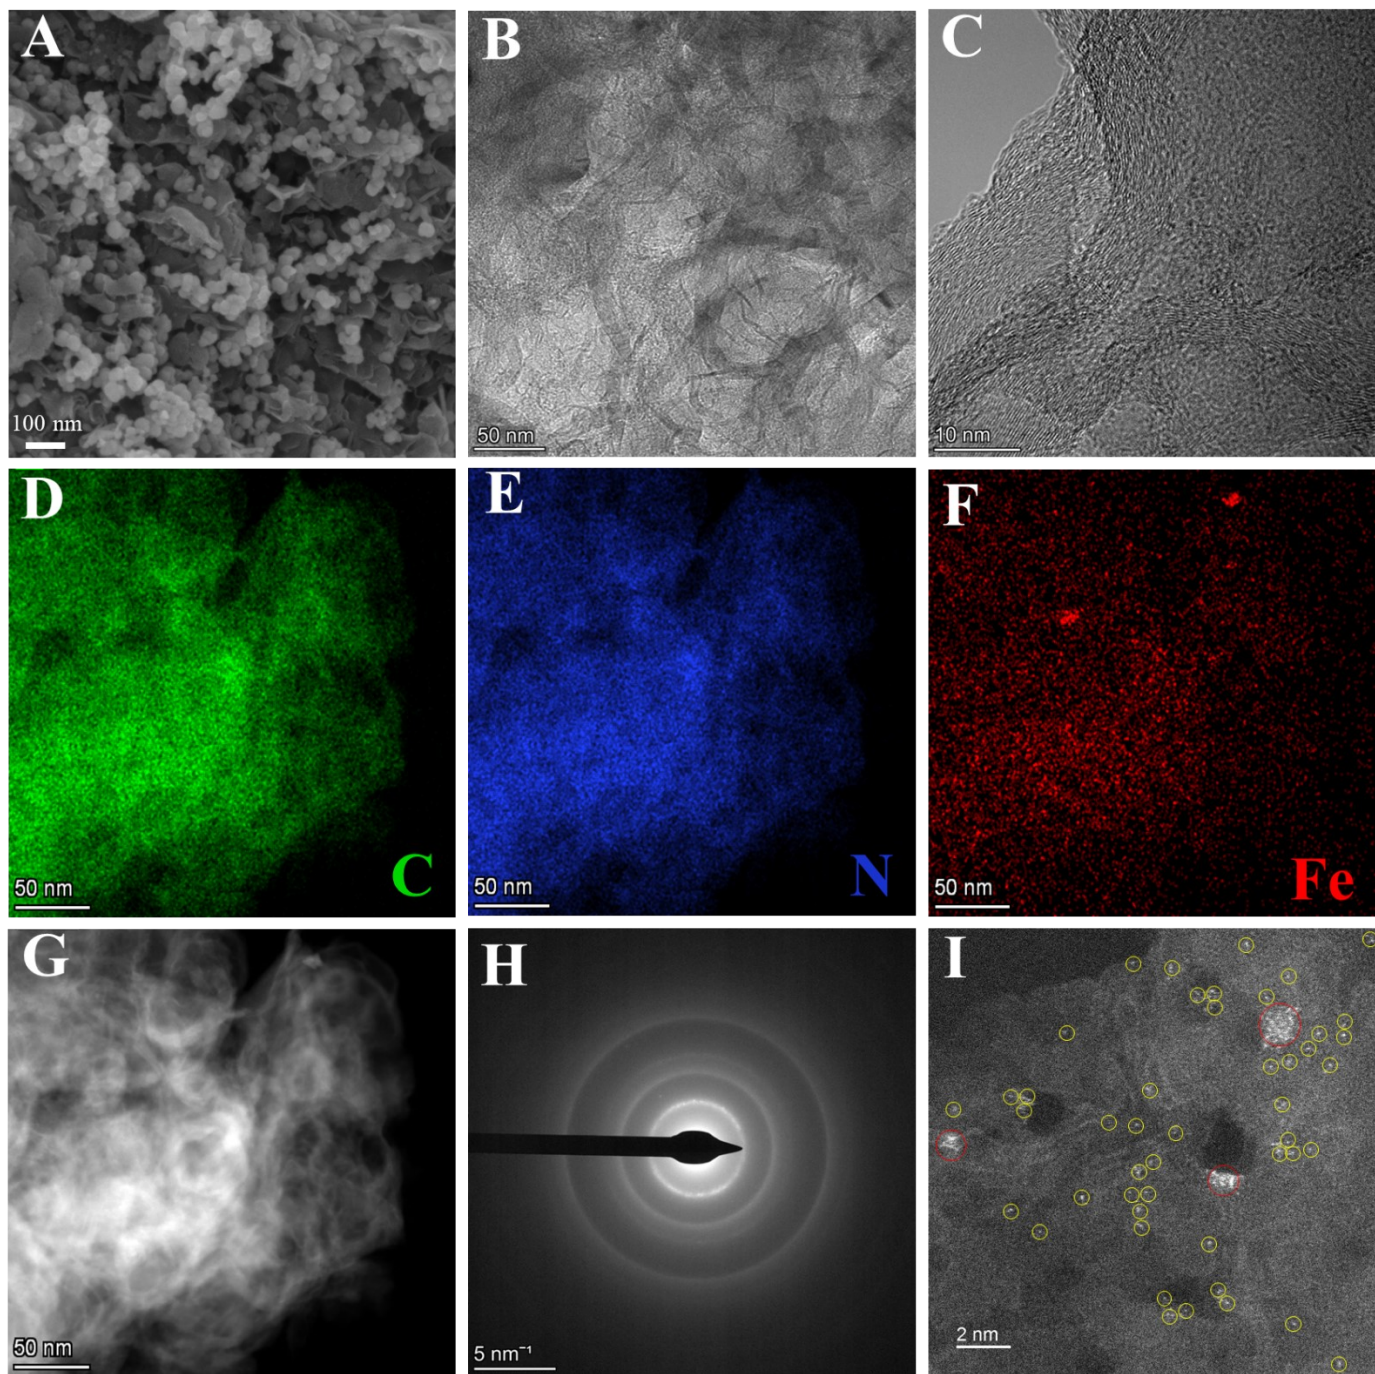

**Fig. S2** A) SEM, B) TEM, C) HRTEM, G) HAADF-STEM and corresponding elemental mapping images of D) C, E) N and F) Fe elements, H) SAED, and I) aberration-corrected HAADF-STEM image (yellow circles: single atoms; red circles: clusters) of  $\text{Fe}_{\text{SA}}/\text{Fe}_{\text{AC}}\text{-NC 1000}$ .

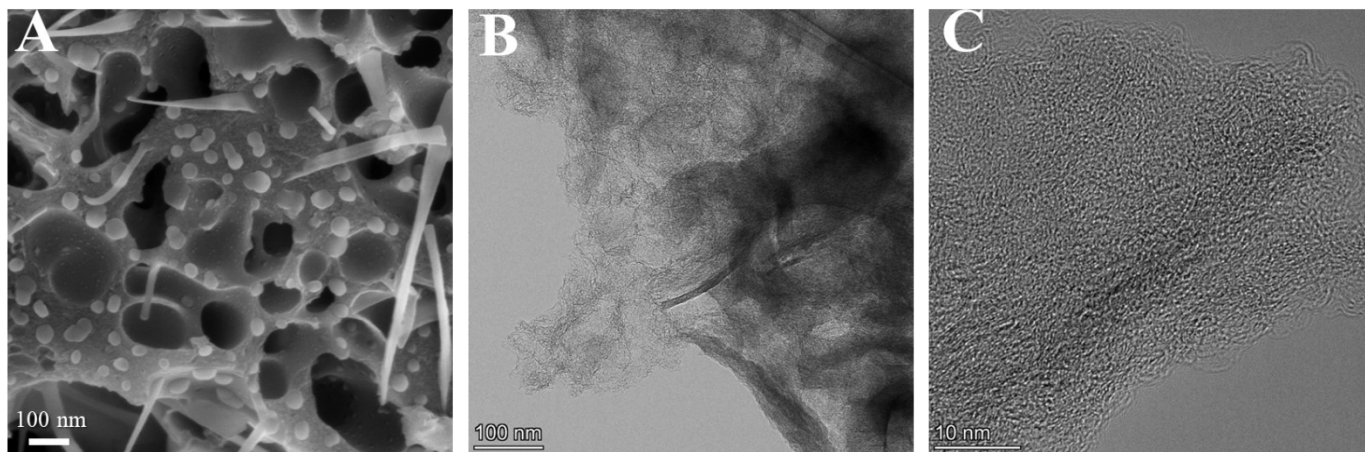

**Fig. S3** A) SEM, B) TEM and C) HRTEM images of C 900.

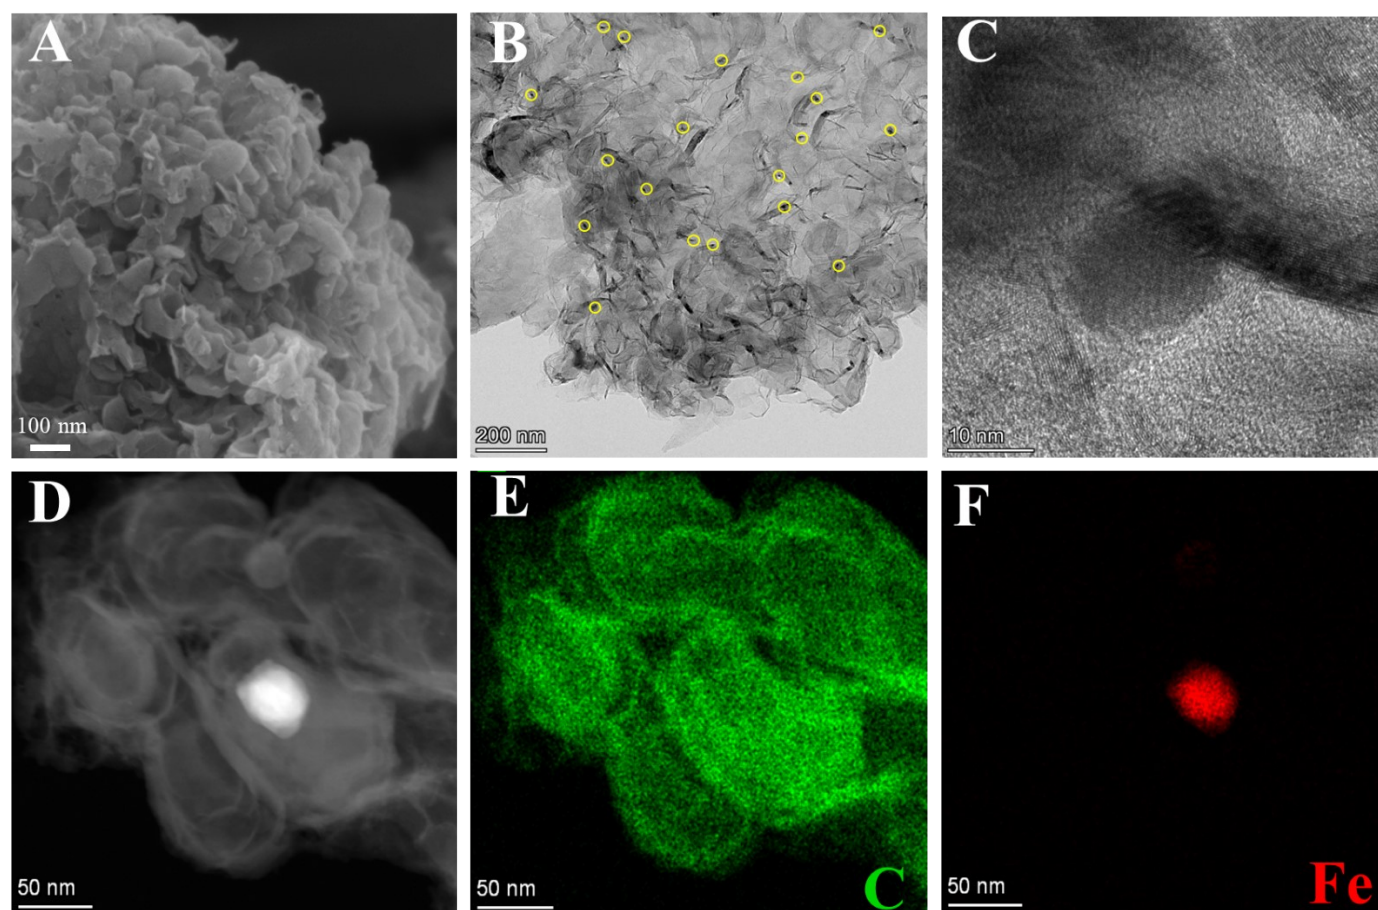

**Fig. S4** A) SEM, B) TEM, C) HRTEM and D) HAADF-STEM and corresponding elemental mapping images of E) C and F) Fe elements in  $\text{Fe}_{\text{AC}}\text{-C 900}$ . In B), the yellow circles indicate the Fe micro-clusters of the carbon framework.

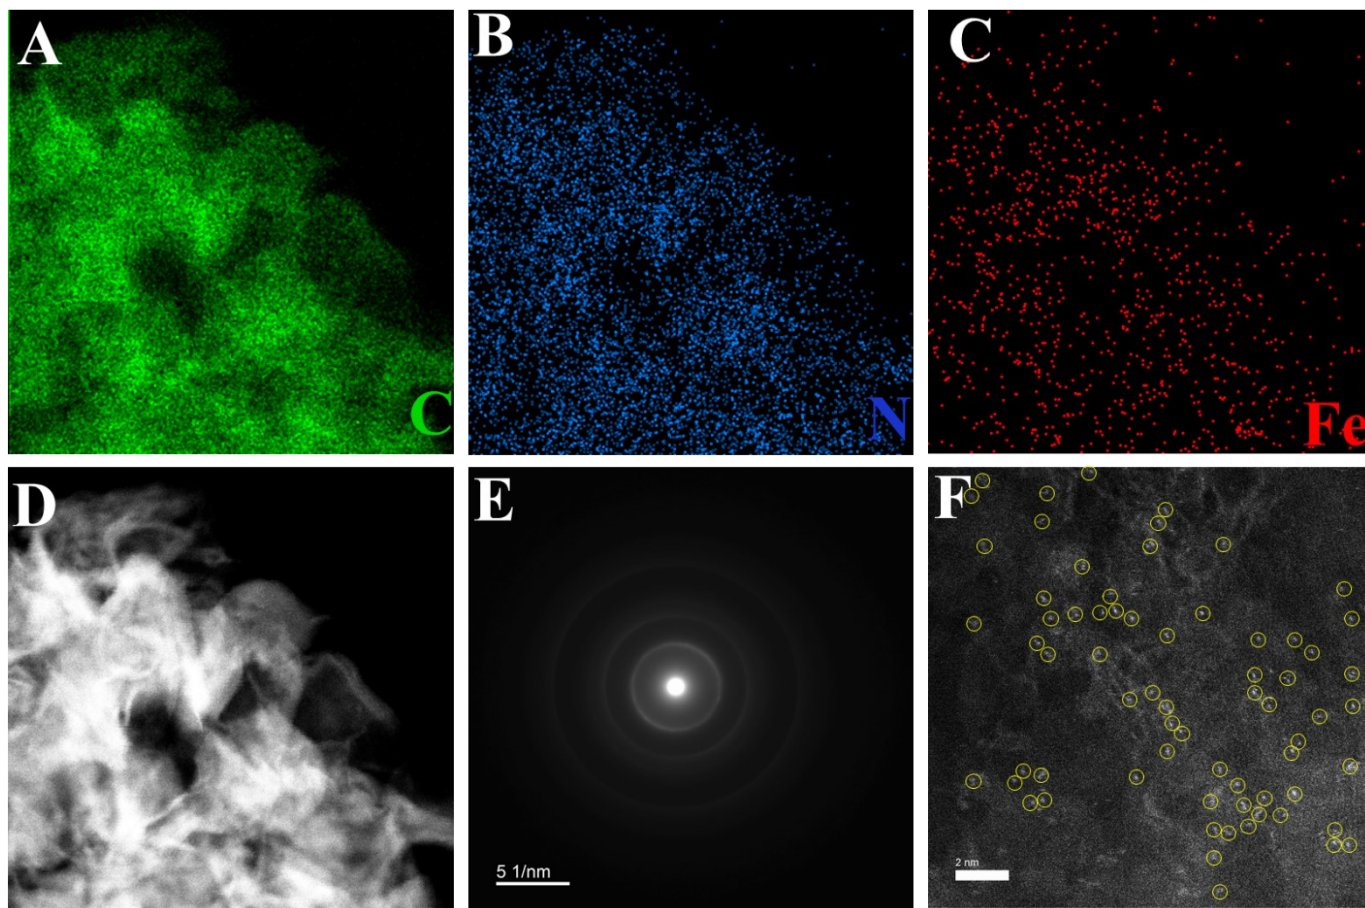

**Fig. S5** D) HAADF-STEM and corresponding elemental mapping images of A) C, B) N and C) Fe elements, E) SAED, and F) aberration-corrected HAADF-STEM image (yellow circles: single atoms) of Fe<sub>S<sub>A</sub></sub>-NC 900.

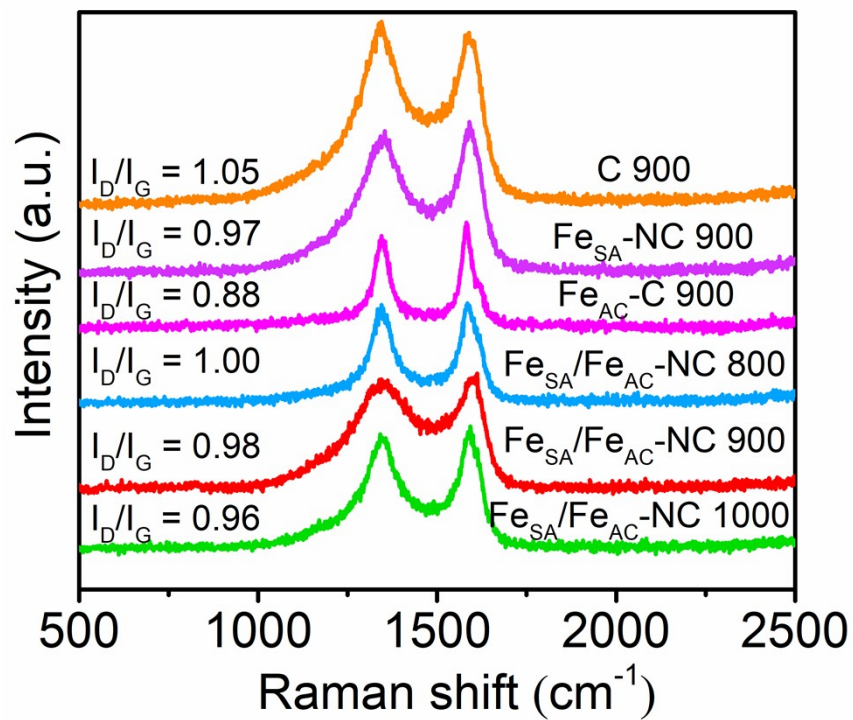

**Fig. S6** Raman scattering patterns of electrocatalysts.

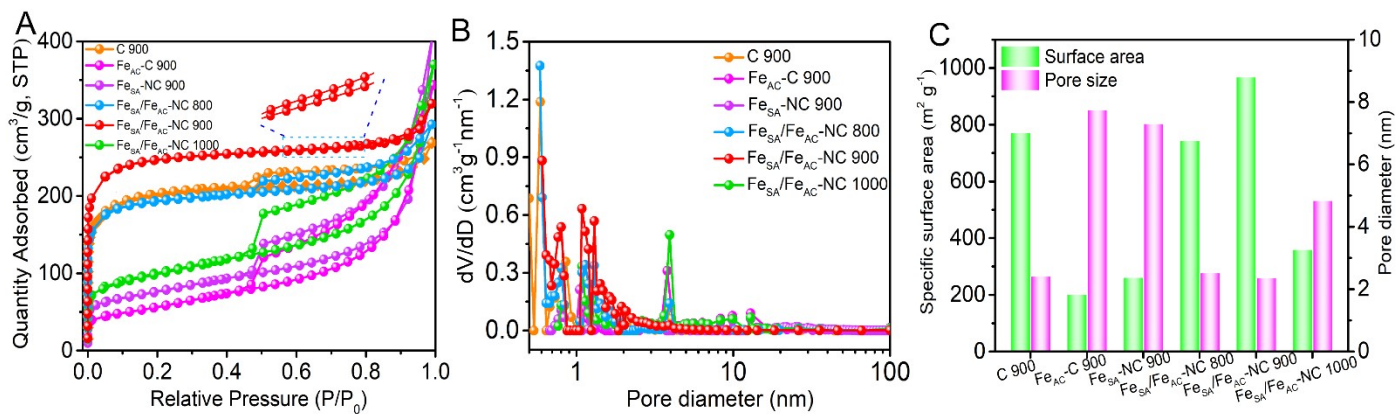

**Fig. S7** A) N<sub>2</sub> adsorption/desorption isotherms, B) pore diameter distributions, C) BET pore widths and specific surface areas of electrocatalysts.



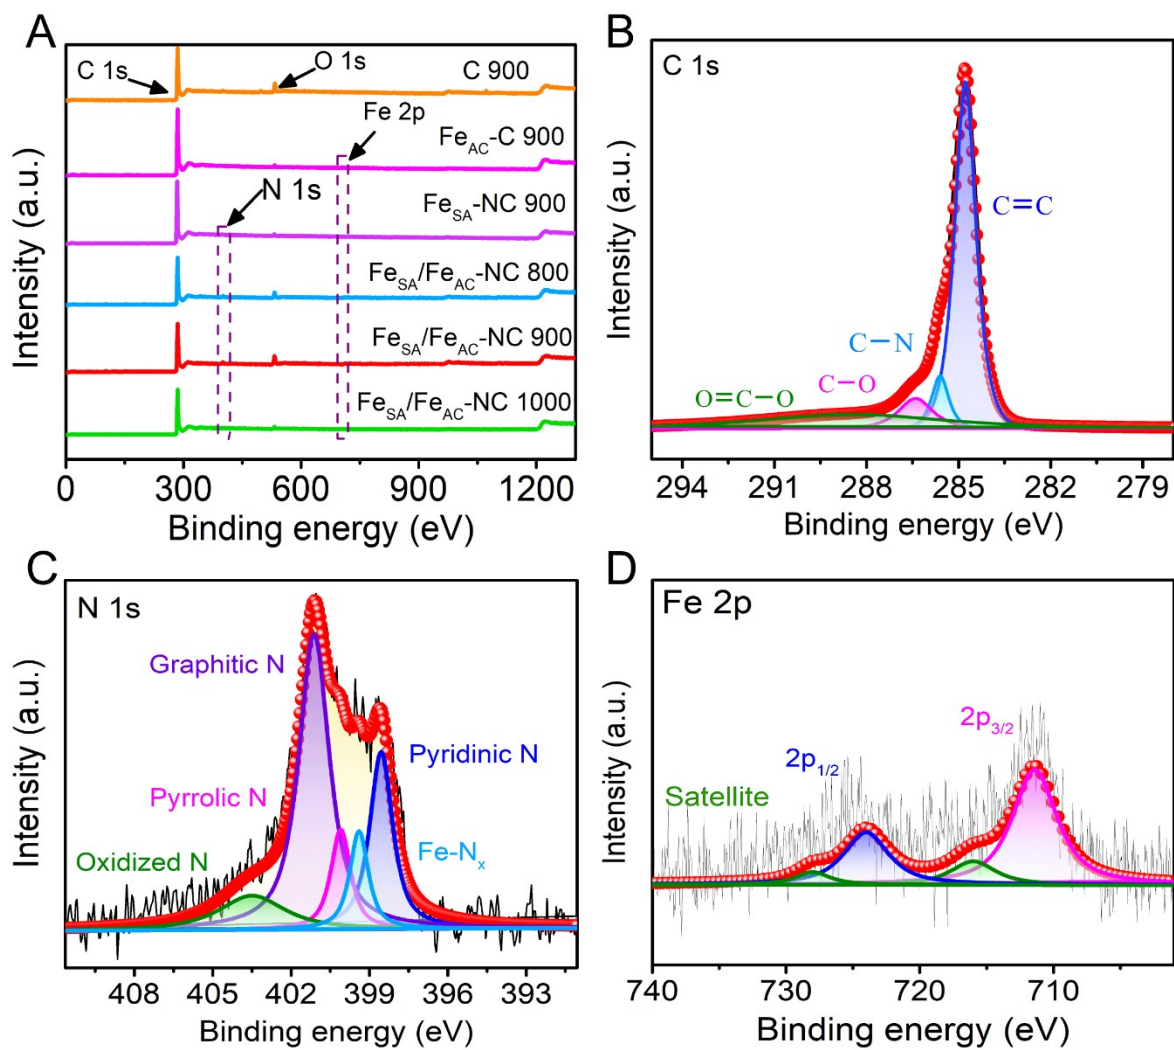

**Fig. S8** A) XPS survey spectra of electrocatalysts. B) High-resolution C 1s, C) N 1s, and D) Fe 2p spectra of Fe<sub>SA</sub>/Fe<sub>AC</sub>-NC 900.

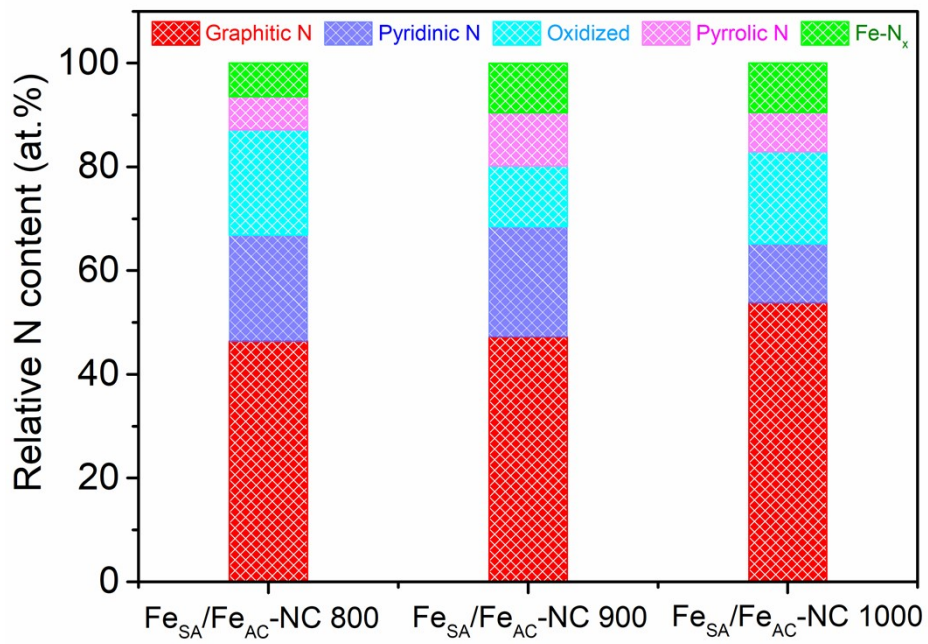

**Fig. S9** The contents of different N species of Fe<sub>SA</sub>/Fe<sub>AC</sub>-NCs catalysts.

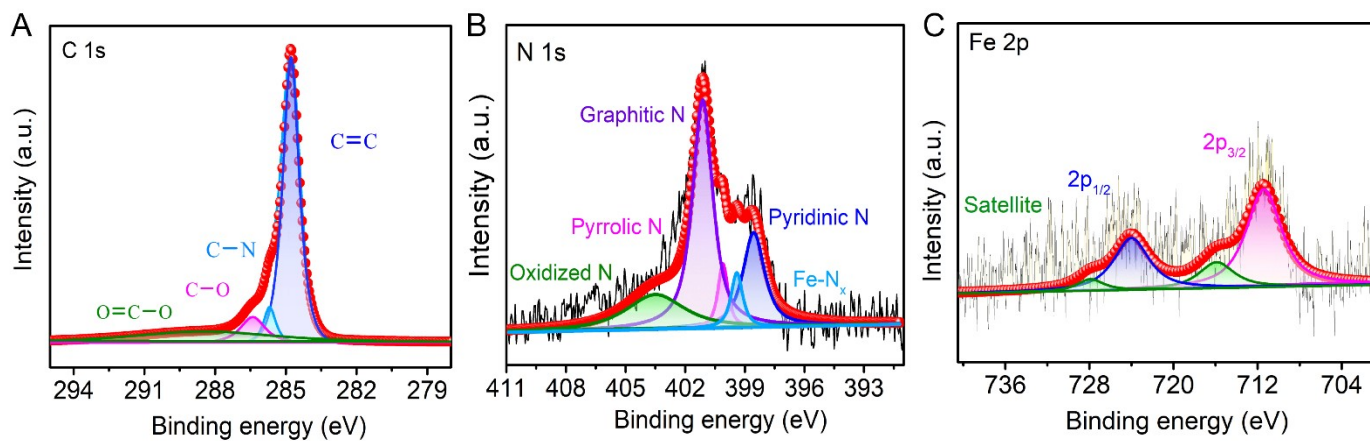

**Fig. S10** A) High-resolution C 1s spectra, B) N 1s spectra and C) Fe 2p spectra of Fe<sub>SA</sub>/Fe<sub>AC</sub>-NC 800.

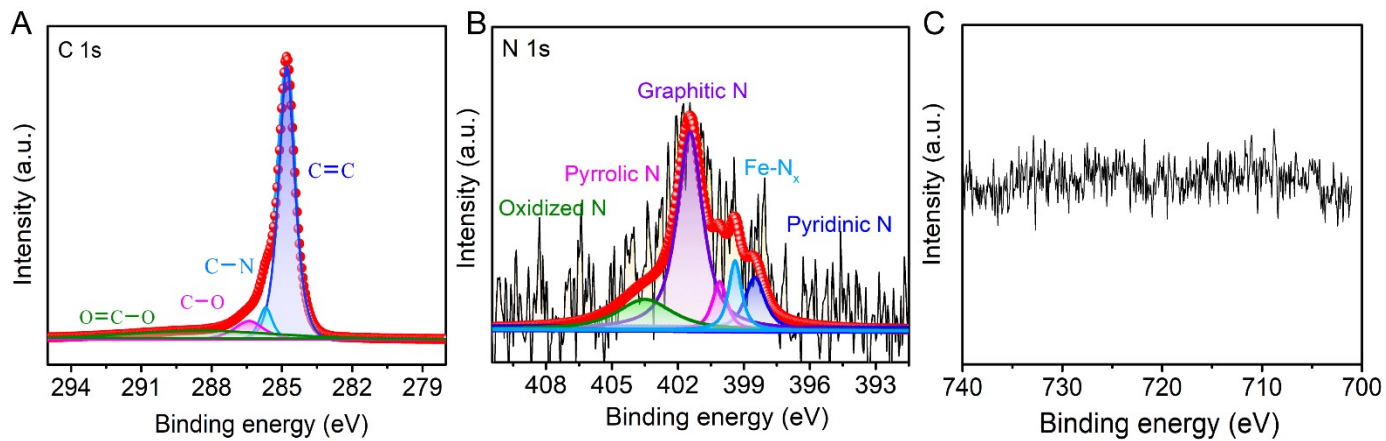

**Fig. S11** A) High-resolution C 1s spectra, B) N 1s spectra and C) Fe 2p spectra of Fe<sub>SA</sub>/Fe<sub>AC</sub>-NC 1000.

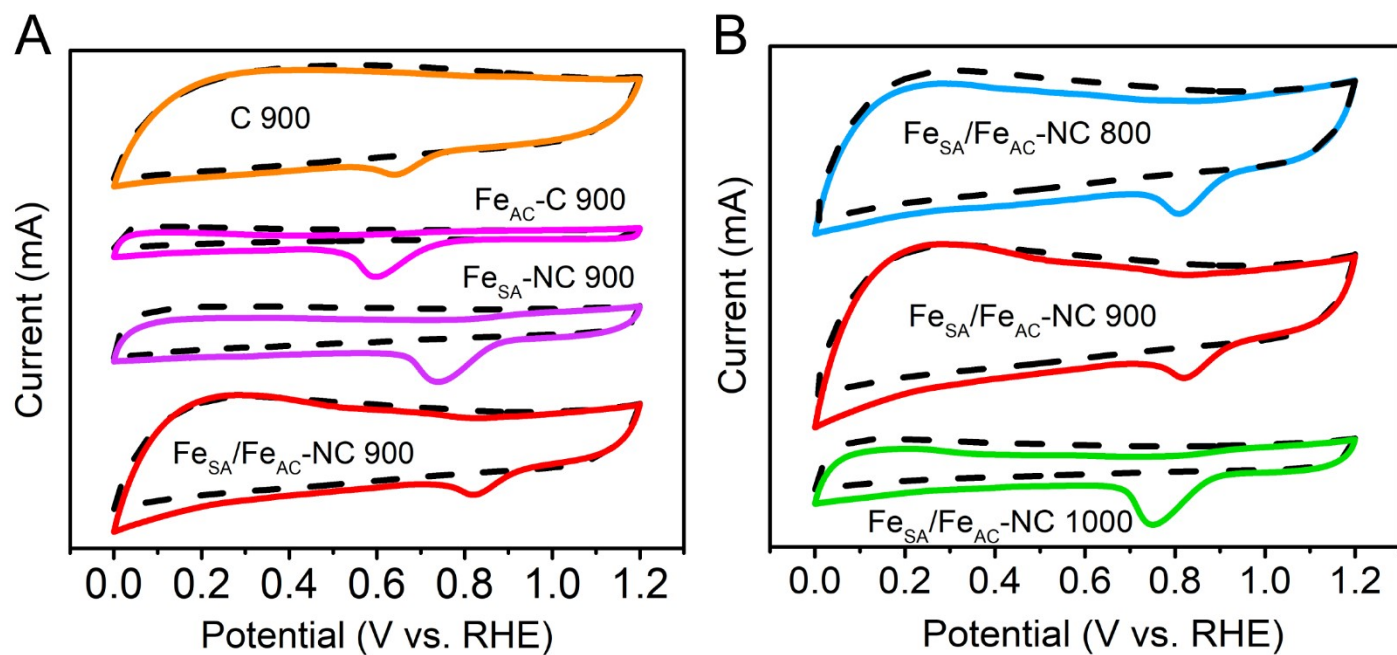

**Fig. S12** CV curves for A) catalysts based on doping source and B) catalysts based on pyrolysis temperature in N<sub>2</sub>-saturated (dash line) and O<sub>2</sub>-saturated (solid line) 0.1 M KOH electrolyte.

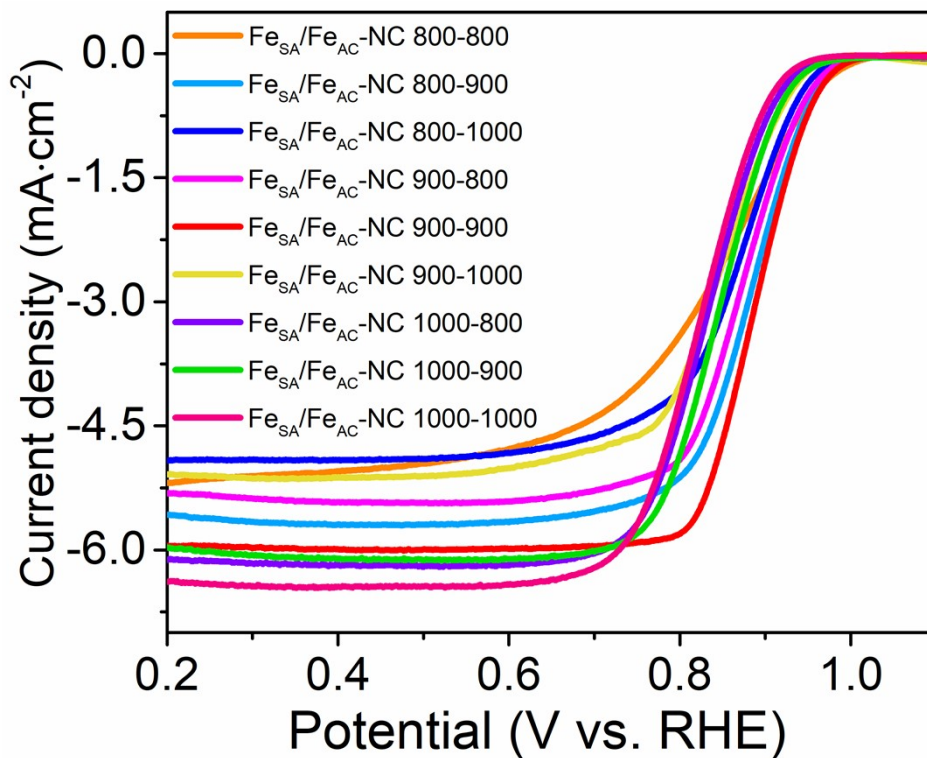

**Fig. S13** ORR polarization curves of  $\text{Fe}_{\text{SA}}/\text{Fe}_{\text{AC}}\text{-NCs}$  electrocatalysts that are manufactured under different pyrolysis temperatures.

We first annealed the  $\text{Fe}_{\text{SA}}/\text{Fe}_{\text{AC}}\text{-NC}$  precursors from 800 to 1000 °C. After acid etching, the acquired product was carbonized again from 800 to 1000 °C. And the final catalyst was denoted as  $\text{Fe}_{\text{SA}}/\text{Fe}_{\text{AC}}\text{-NC-a-b}$ , where a was the first pyrolysis temperature and b was the second pyrolysis temperature. The ORR polarization properties of all obtained samples were evaluated in an  $\text{O}_2$ -saturated 0.1 M KOH aqueous resolution.

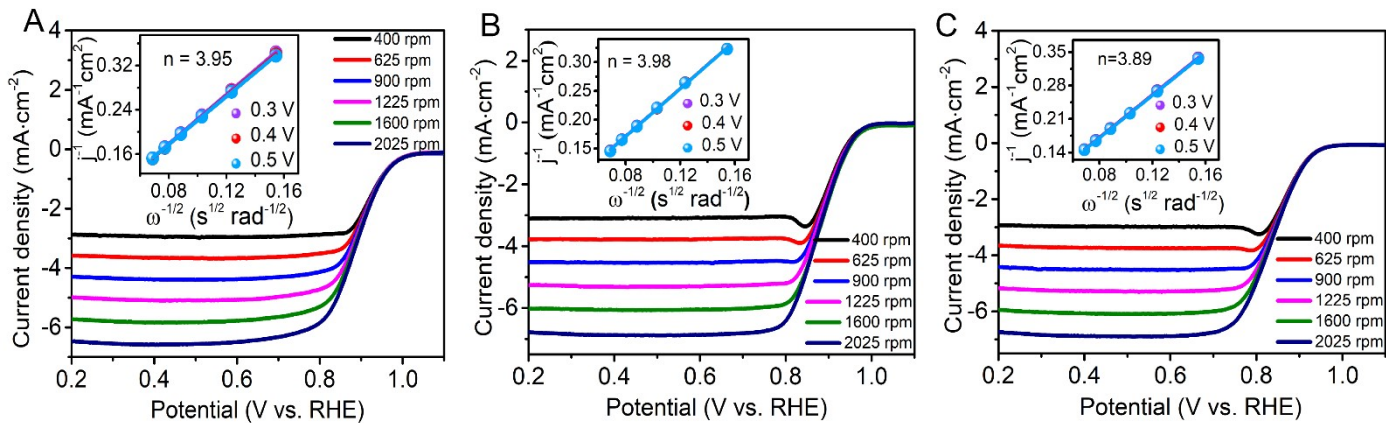

**Fig. S14** LSV polarization curves of the Fe<sub>SA</sub>/Fe<sub>AC</sub>-NC 800 A), Fe<sub>SA</sub>/Fe<sub>AC</sub>-NC 900 B) and Fe<sub>SA</sub>/Fe<sub>AC</sub>-NC 1000 C) catalysts in an O<sub>2</sub>-saturated 0.1 M KOH aqueous solution at a sweep rate of 5 mV s<sup>-1</sup> with different rotation rates (400-2025 rpm) and the corresponding K-L plots ( $j^{-1}$  versus  $\omega^{-1/2}$ ) at different potentials (inset).

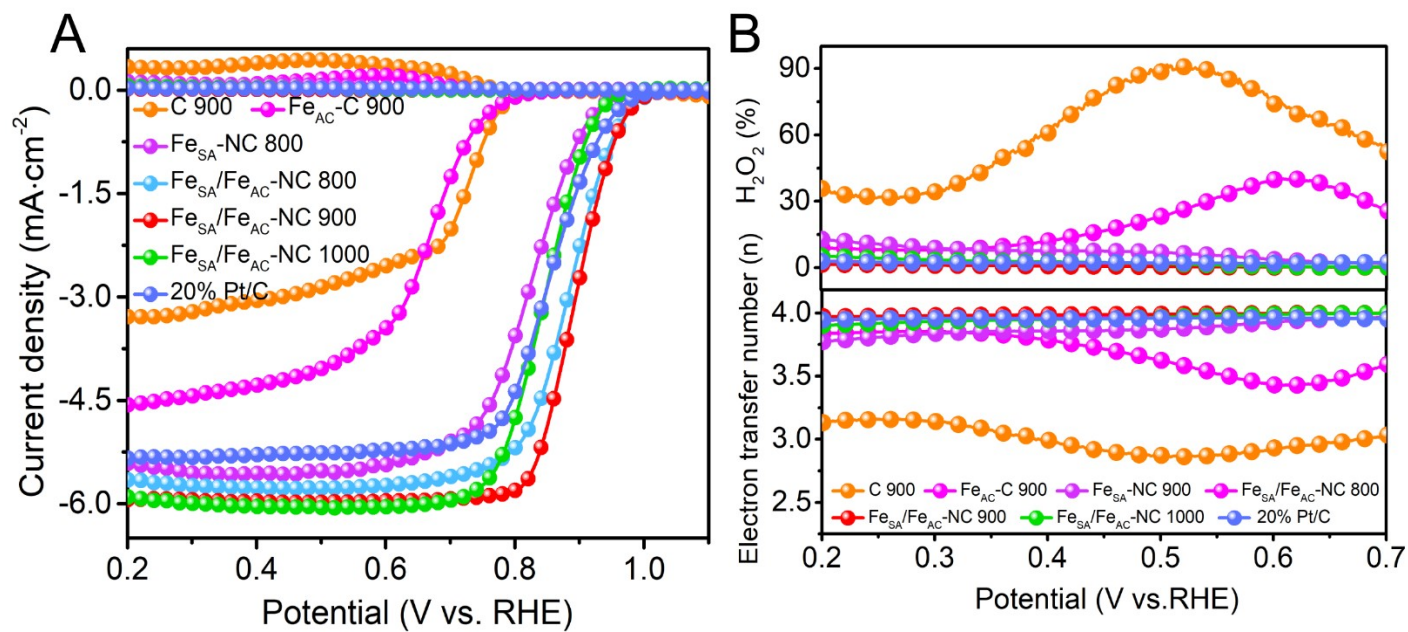

**Fig. S15** A) Disk and ring current, B) electron transfer number ( $n$ ) and  $\text{H}_2\text{O}_2$  yield for various catalysts at 1600 rpm in alkaline media.



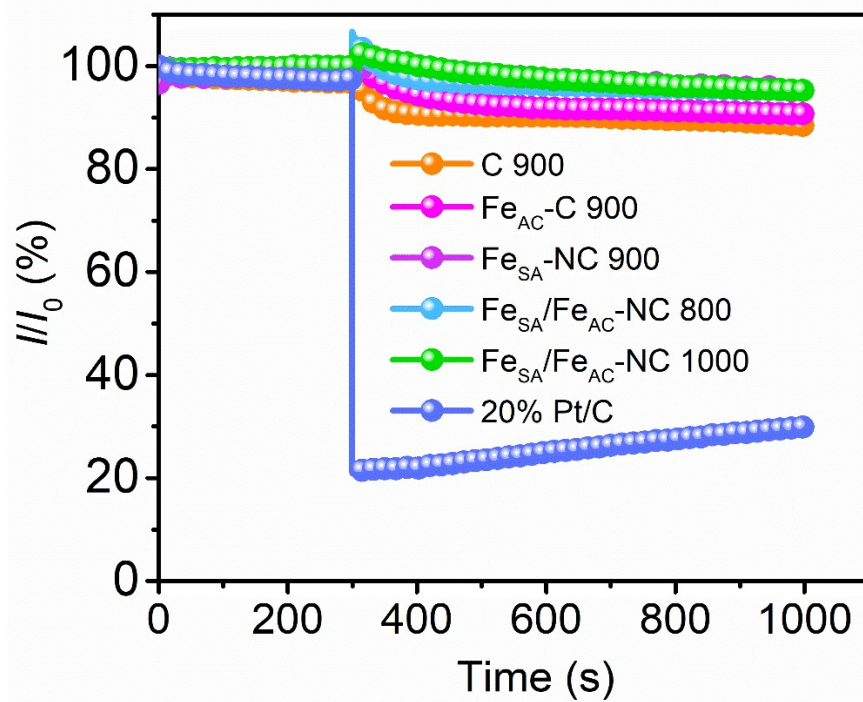

**Fig. S16** *I-t* CA responses for various catalysts at 0.6 V and 1600 rpm with 3M methanol addition at around 300s in 0.1 M KOH.  $I_0$  defined the initial current.

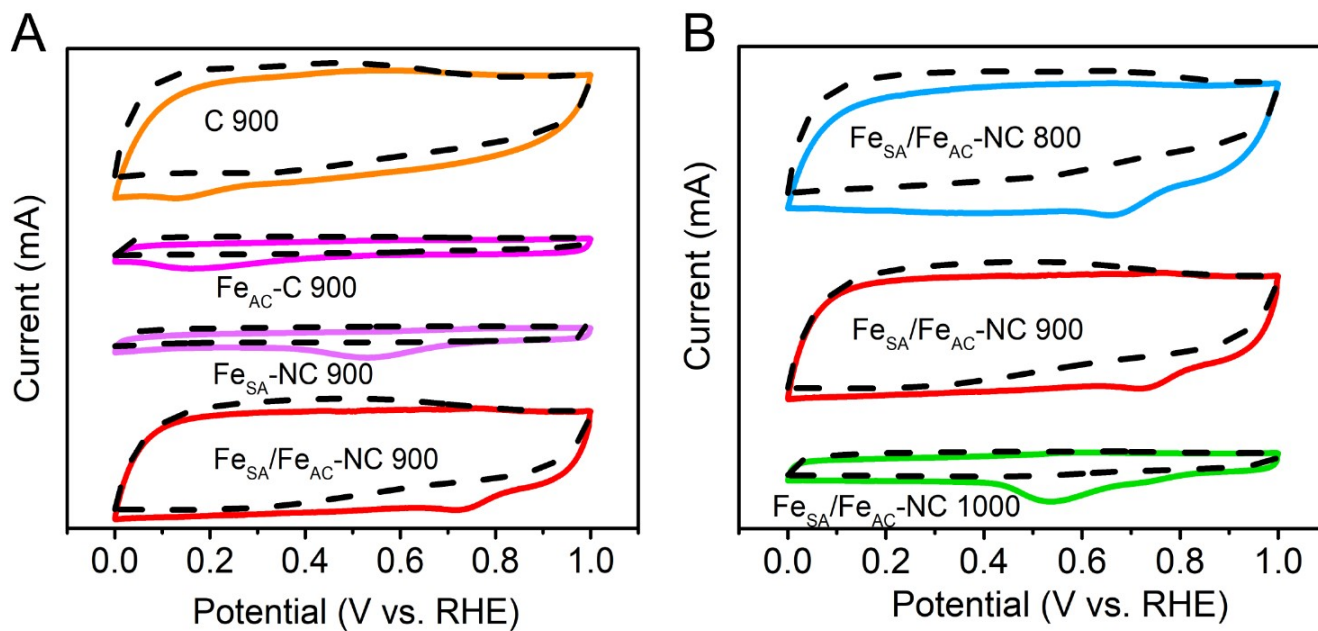

**Fig. S17** CV curves for A) catalysts based on doping source and B) catalysts based on pyrolysis temperature in N<sub>2</sub>-saturated (dash line) and O<sub>2</sub>-saturated (solid line) 0.1 M HClO<sub>4</sub> electrolyte.

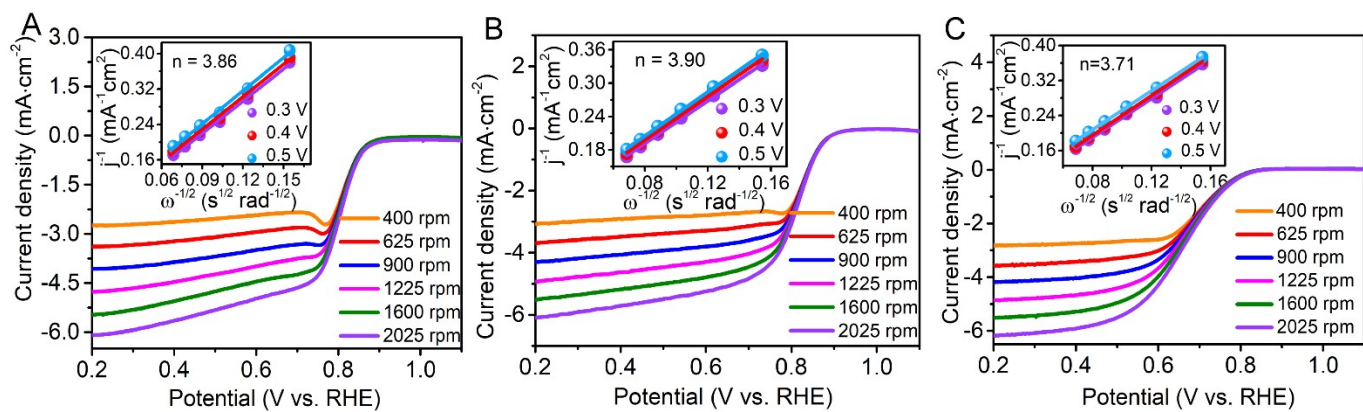

**Fig. S18** LSV polarization curves of the Fe<sub>SA</sub>/Fe<sub>AC</sub>-NC 800 (A), Fe<sub>SA</sub>/Fe<sub>AC</sub>-NC 900 (B) and Fe<sub>SA</sub>/Fe<sub>AC</sub>-NC 1000 (C) catalyst in an O<sub>2</sub>-saturated 0.1 M HClO<sub>4</sub> aqueous solution at a sweep rate of 5 mV s<sup>-1</sup> with different rotation rates (400-2025 rpm) and the corresponding K-L plots ( $j^{-1}$  versus  $\omega^{-1/2}$ ) at different potentials (inset).

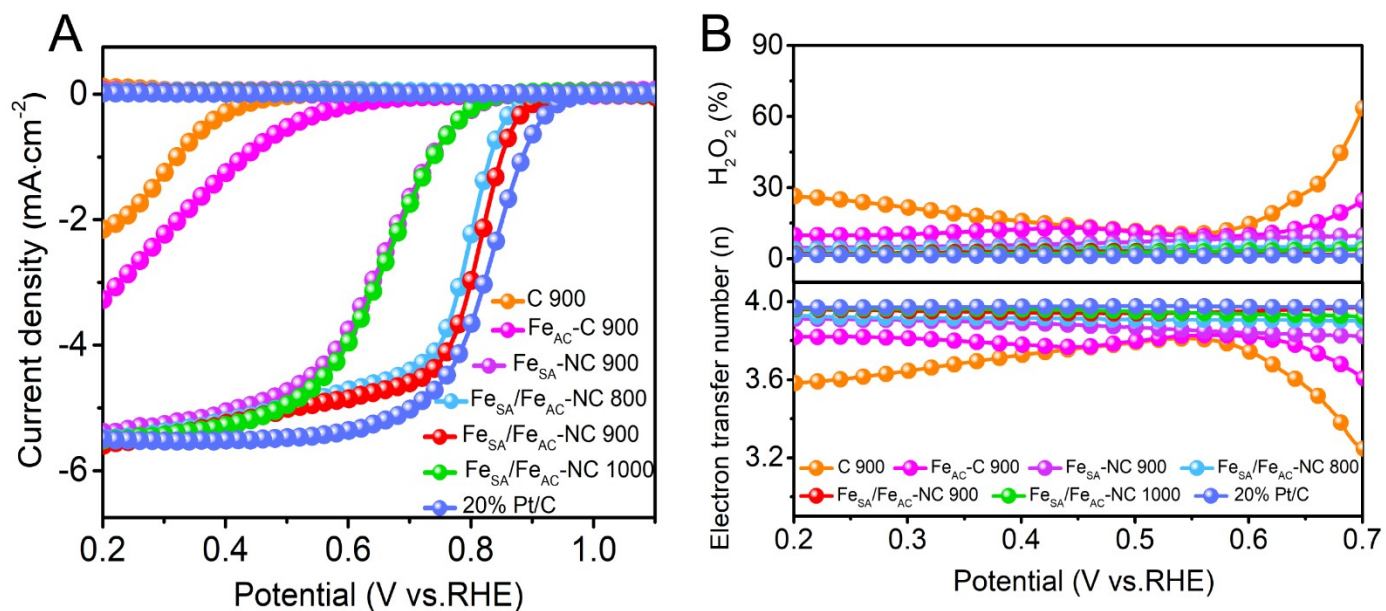

**Fig. S19** A) Disk and ring current, B) electron transfer number (n) and  $\text{H}_2\text{O}_2$  yield for various catalysts at 1600 rpm in acid media.

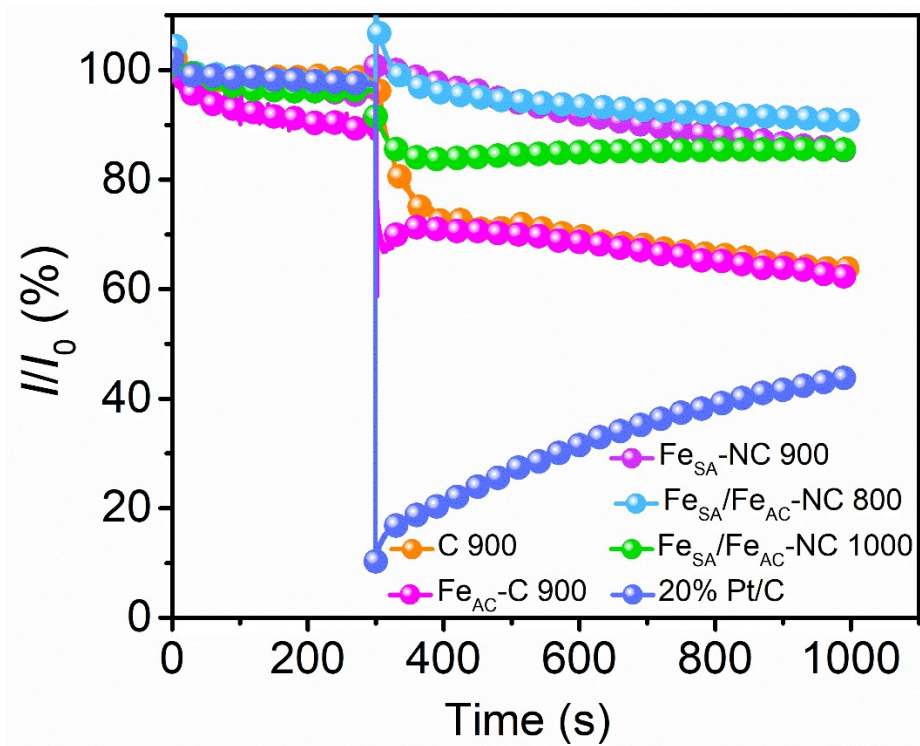

**Fig. S20** *I-t* CA responses for various catalysts at 0.6 V and 1600 rpm with 3M methanol addition at around 300s in 0.1 M HClO<sub>4</sub>.  $I_0$  defined the initial current.

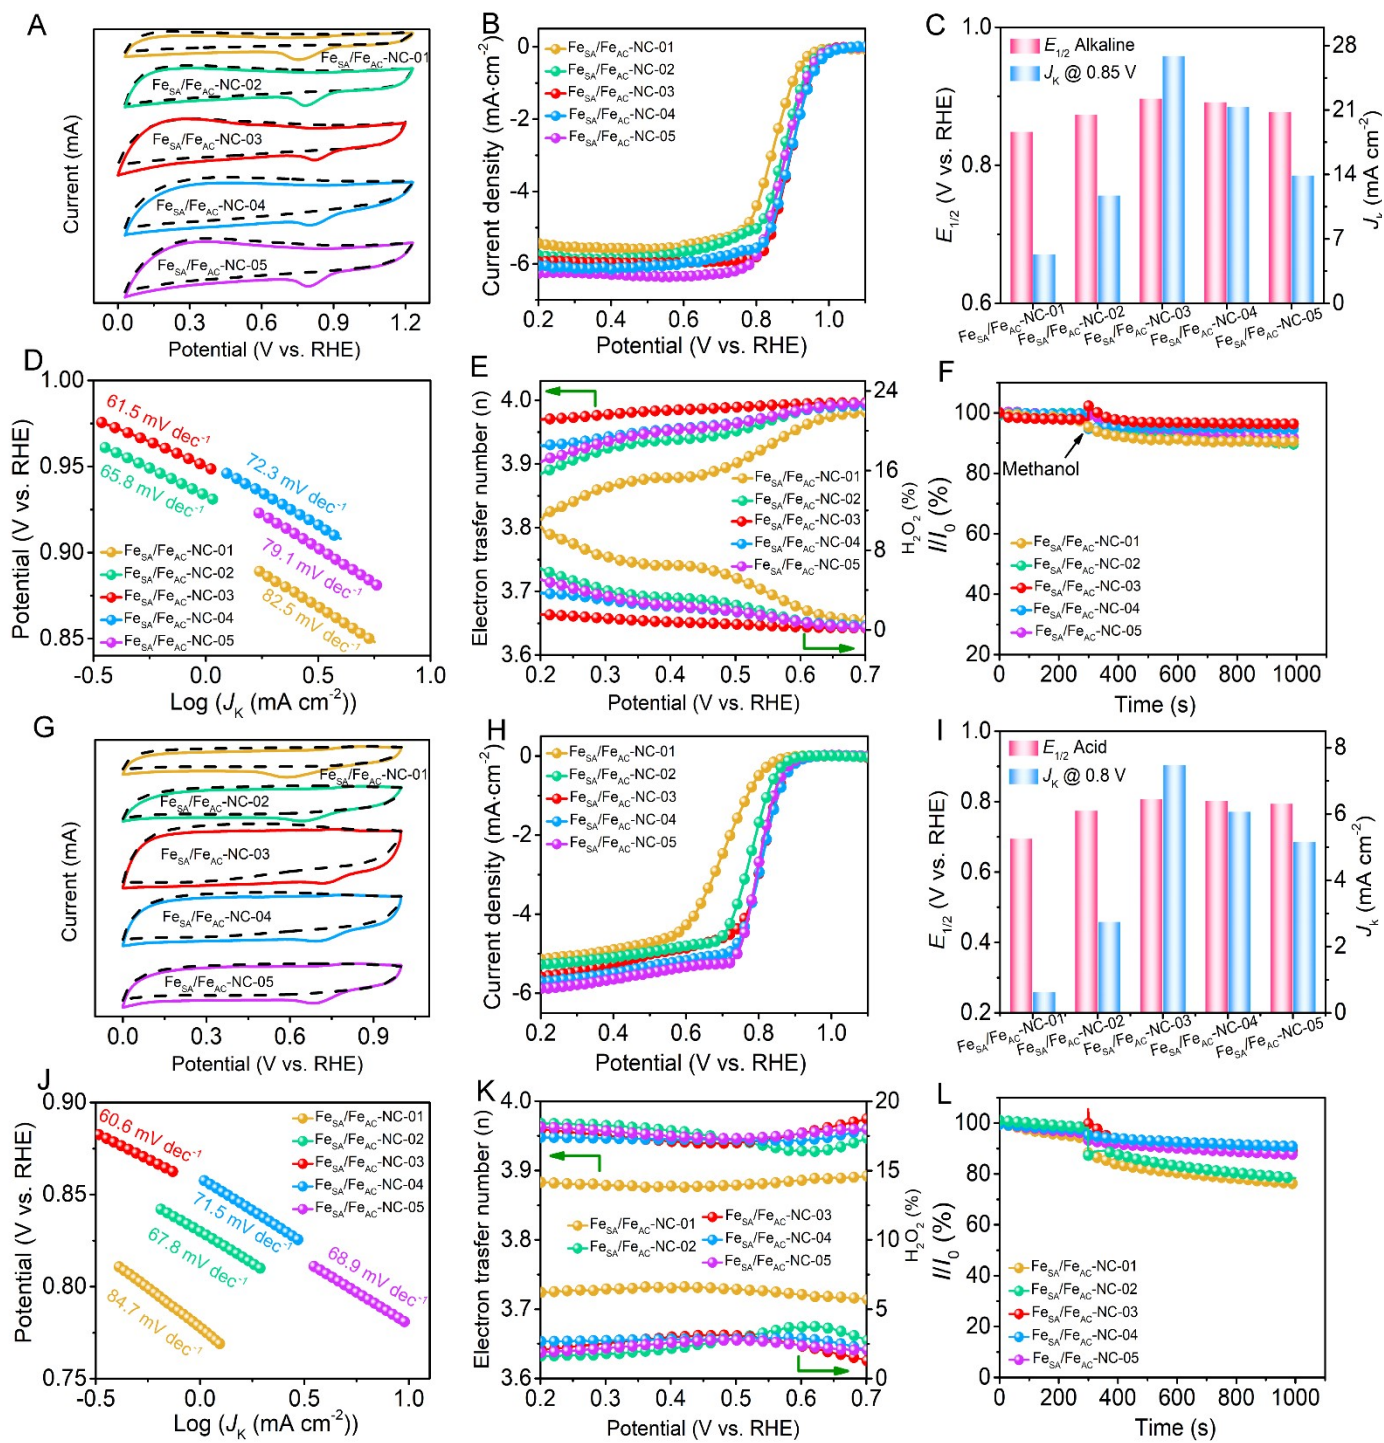

**Fig. S21** Electrocatalytic ORR performance of Fe<sub>SA</sub>/Fe<sub>AC</sub>-NCs. Alkaline electrolyte. A) CV curves. B) LSV curves. C) Summary of  $E_{1/2}$  and  $J_k$  at 0.85 V. D) Tafel slopes. E)  $n$  and H<sub>2</sub>O<sub>2</sub> yield. F) Crossover tolerance. **Acid electrolyte.** G) CV curves. H) LSV curves. I) Summary of  $E_{1/2}$  and  $J_k$  at 0.80 V. J) Tafel slopes. K)  $n$  and H<sub>2</sub>O<sub>2</sub> yield. L) Crossover tolerance.

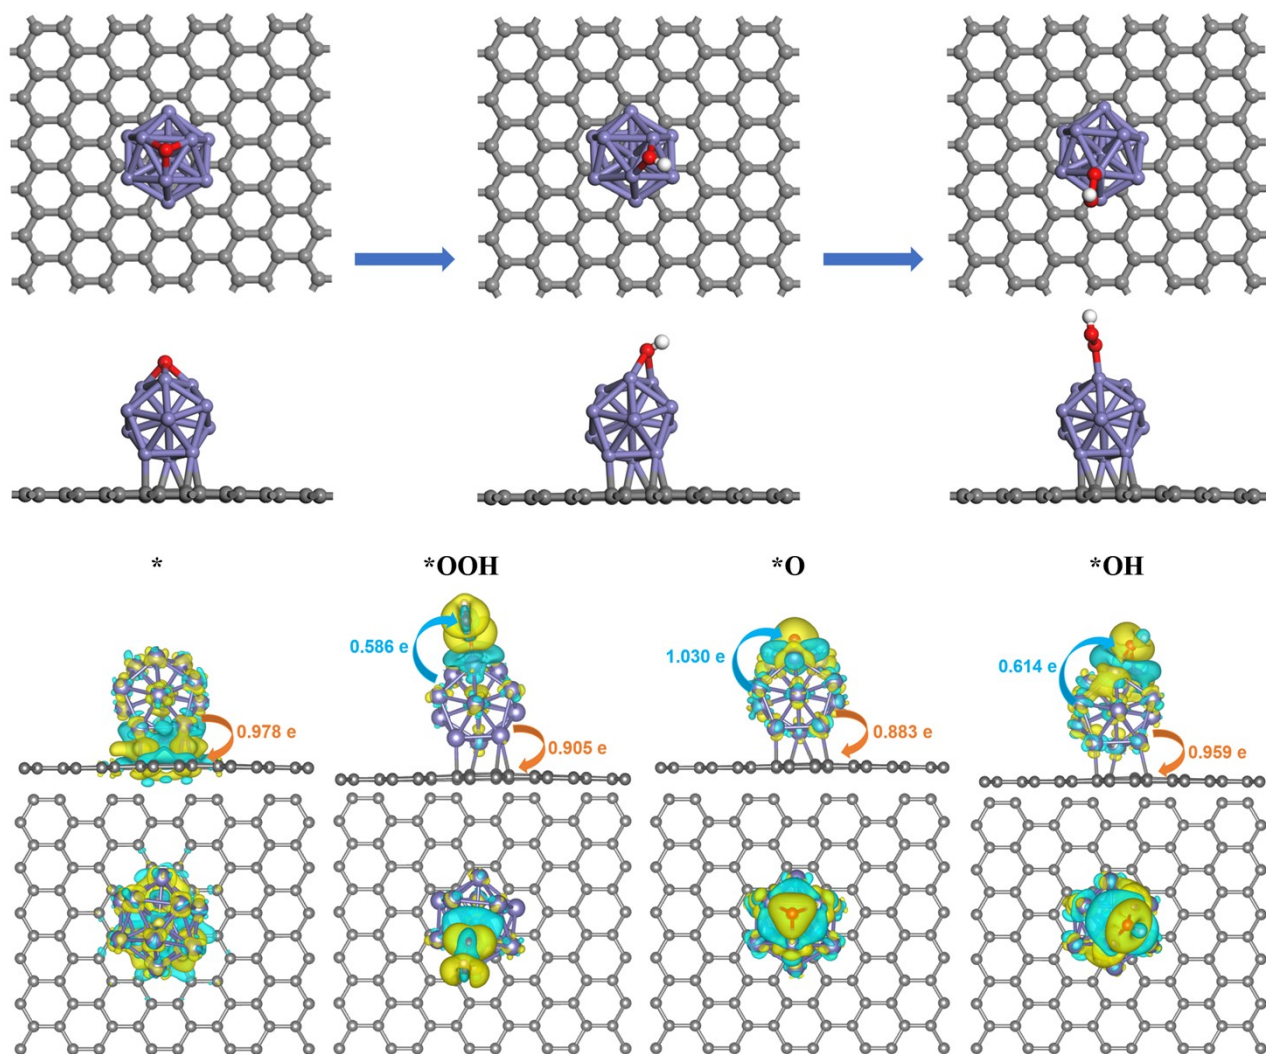

**Fig. S22** The relaxed structures of oxygenous intermediates (\*OOH, \*O, and \*OH) on the Fe<sub>AC</sub>/C model and the corresponding Bader charge are labeled with an isosurface of 0.0015 e Bohr<sup>-3</sup> by DFT calculation. The orange arrows represent the charge transfer from the Fe cluster to the carbon substrate, while the blue arrows represent the charge transfer from the Fe cluster to the oxygenous intermediates. The yellow region represents the charge accumulation, while the cyan region represents the charge depletion.

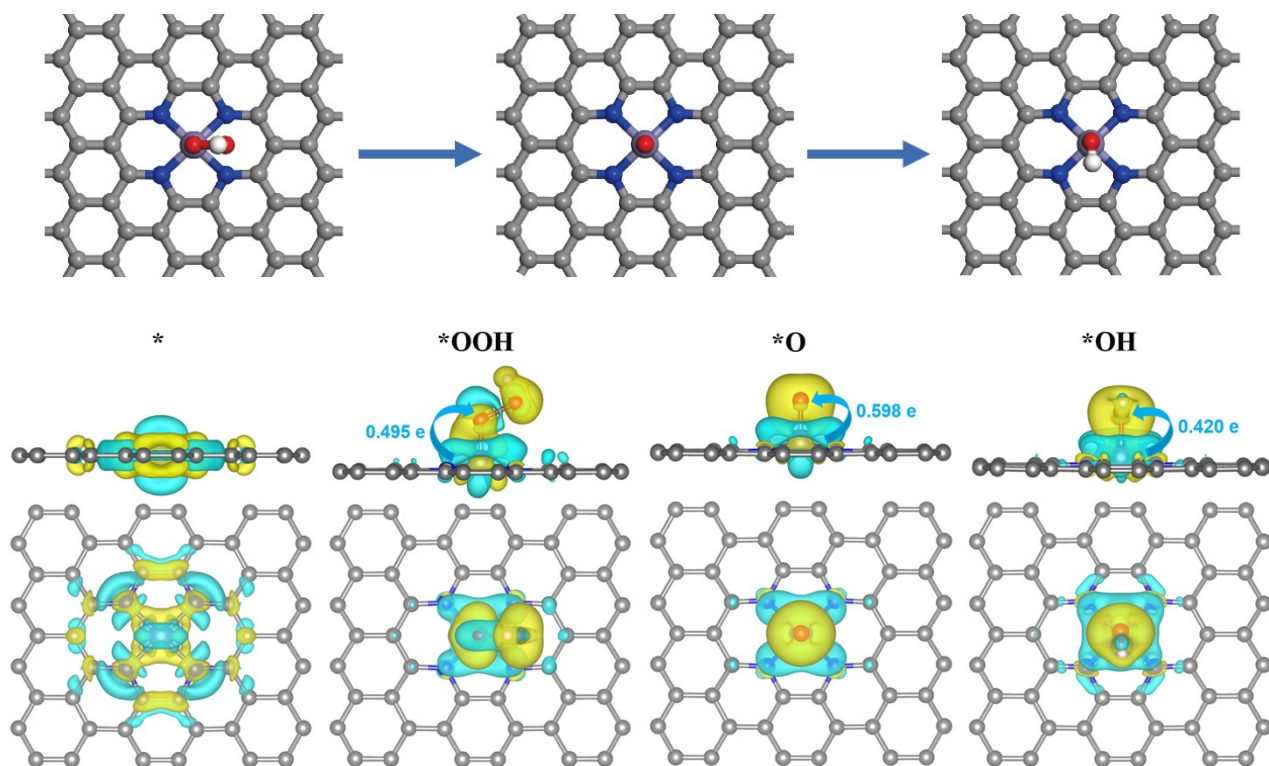

**Fig. S23** The relaxed structures of oxygenous intermediates (\*OOH, \*O, and \*OH) on the Fe<sub>S</sub>A/C model and the corresponding Bader charge are labeled with an isosurface of 0.0015 e Bohr<sup>-3</sup> by DFT calculation. The blue arrows represent the charge transfer from the FeN<sub>4</sub> site to the oxygenous intermediates. The yellow region represents the charge accumulation, while the cyan region represents the charge depletion.



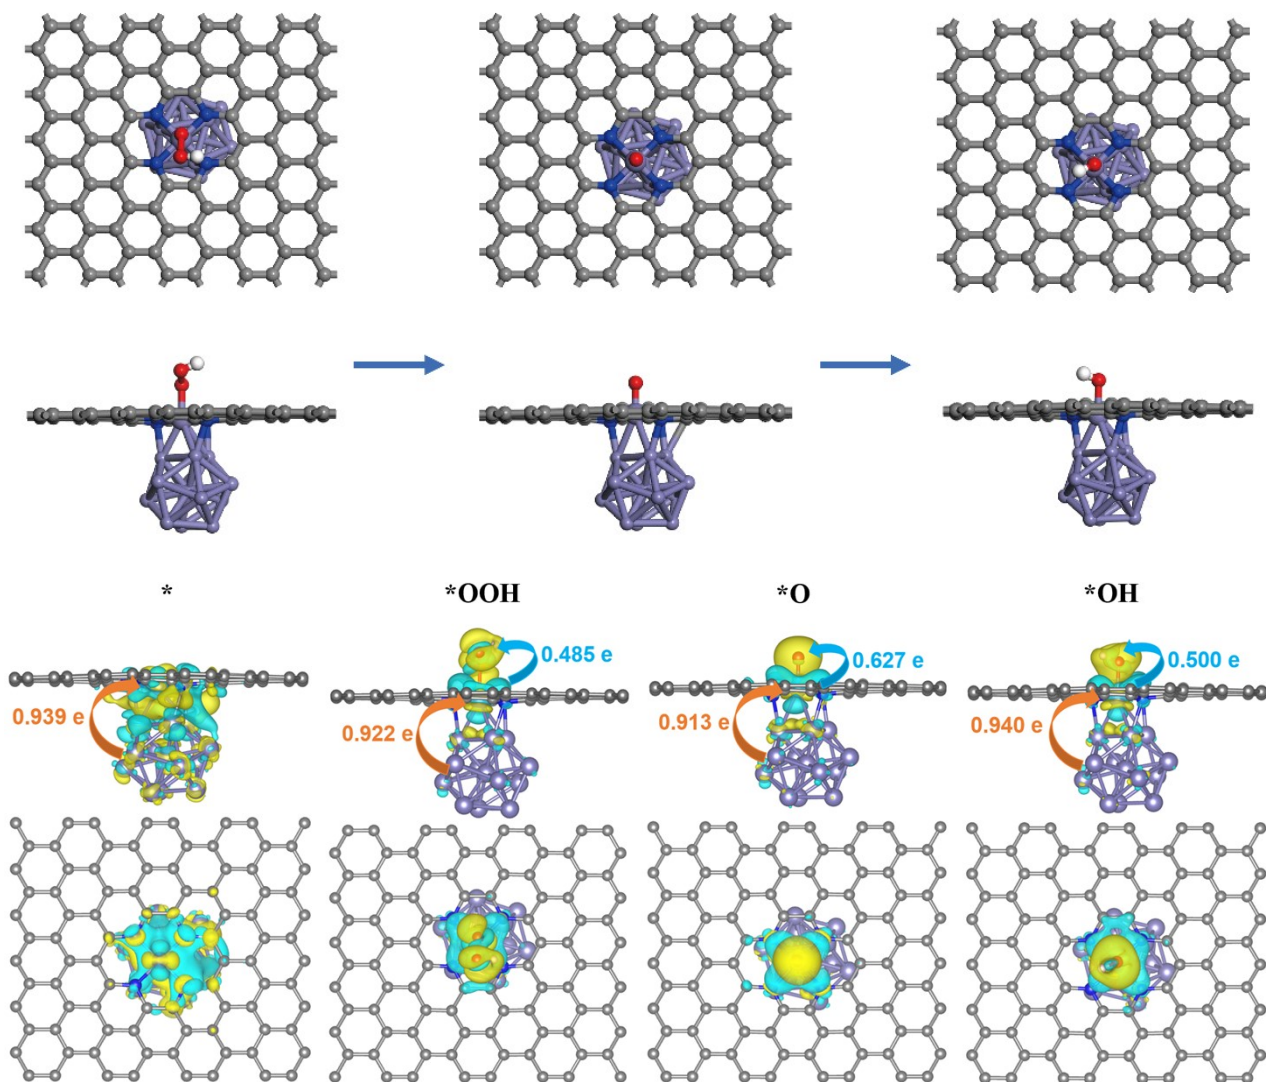

**Fig. S24** The relaxed structures of oxygen intermediates (\*OOH, \*O, and \*OH) on the Fe<sub>SA</sub>/C-Fe<sub>AC</sub> model and the corresponding Bader charge are labeled with an isosurface of 0.0015 e Bohr<sup>-3</sup> by DFT calculation. The orange arrows represent the charge transfer from the Fe cluster to the FeN<sub>4</sub> site, while the blue arrows represent the charge transfer from the FeN<sub>4</sub> site to the oxygen intermediates. The yellow region represents the charge accumulation, while the cyan region represents the charge depletion.

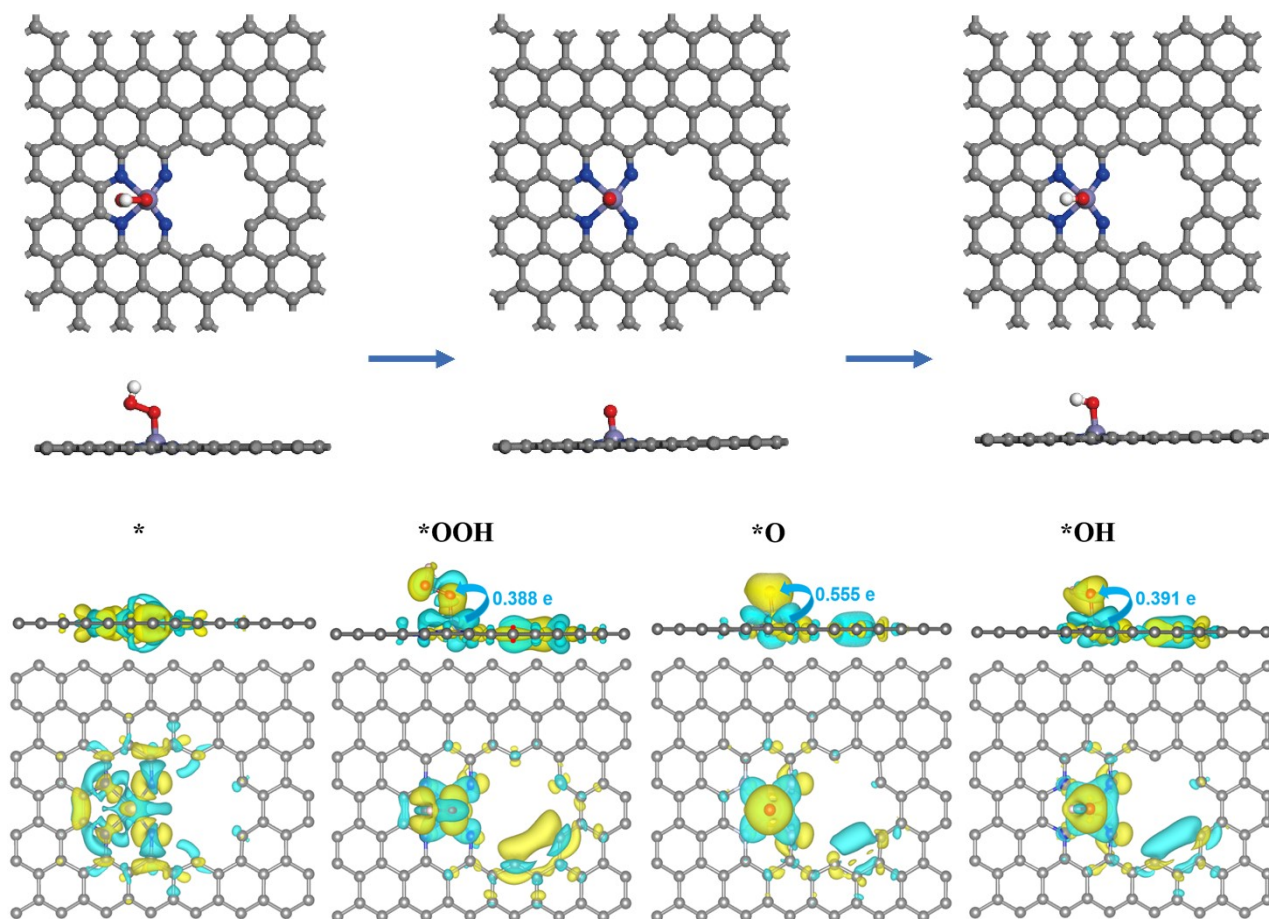

**Fig. S25** The relaxed structures of oxygenous intermediates (\*OOH, \*O, and \*OH) on the  $\text{Fe}_{\text{SA}}/\text{C-Pore}$  model and the corresponding Bader charge are labeled with an isosurface of  $0.0015 \text{ e Bohr}^{-3}$  by DFT calculation. The blue arrows represent the charge transfer from the  $\text{FeN}_4$  site to the oxygenous intermediates. The yellow region represents the charge accumulation, while the cyan region represents the charge depletion.

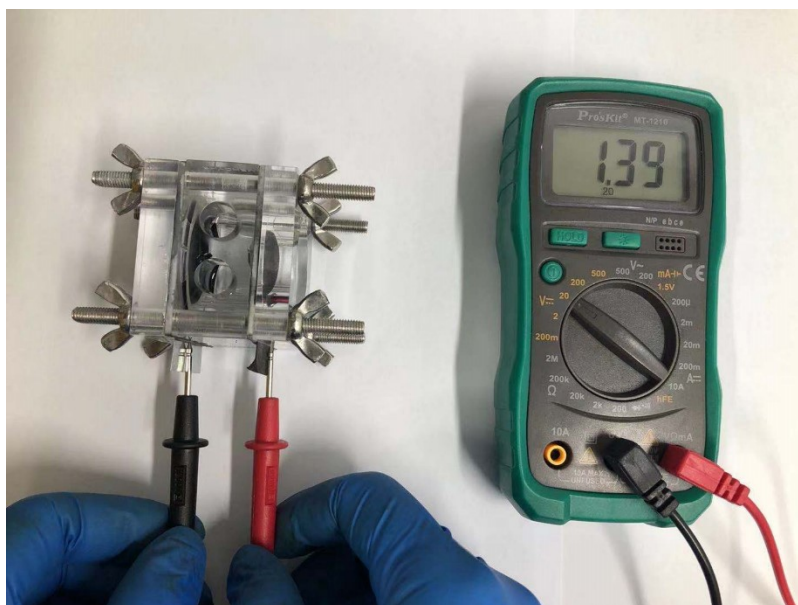

**Fig. S26** Photograph of the 20% Pt/C-based Zn-air battery with an open circuit voltage of 1.39 V.

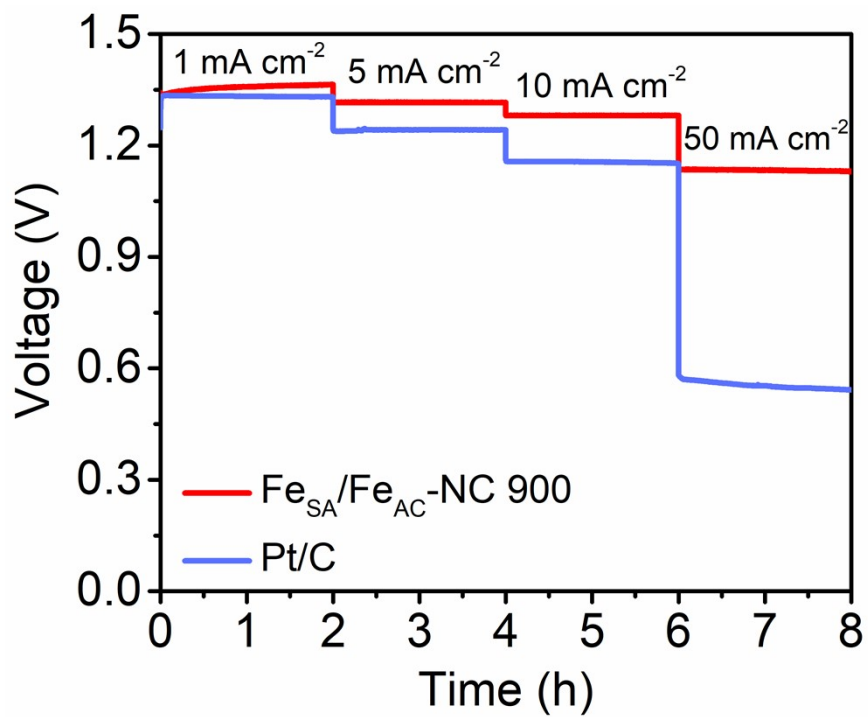

**Fig. S27** Discharge profiles of the Zn-air batteries using Fe<sub>SA</sub>/Fe<sub>AC</sub>-NC 900 and 20% Pt/C as the air catalysts different current densities (1, 5, 10 and 50 mA cm<sup>-2</sup>)

**Table S1** Elements contents of various catalysts from element analyzer and ICP-OES.

| Catalysts                                   | Elements contents (wt%) |      |      |      |
|---------------------------------------------|-------------------------|------|------|------|
|                                             | C                       | H    | N    | Fe   |
| C 900                                       | 82.38                   | 1.16 | -    | -    |
| Fe <sub>AC</sub> -C 900                     | 96.37                   | 0.25 | -    | 1.96 |
| Fe <sub>SA</sub> -NC 900                    | 94.19                   | 0.20 | 0.73 | 0.51 |
| Fe <sub>SA</sub> /Fe <sub>AC</sub> -NC 800  | 74.28                   | 2.01 | 2.44 | 3.19 |
| Fe <sub>SA</sub> /Fe <sub>AC</sub> -NC 900  | 83.96                   | 2.45 | 3.78 | 2.24 |
| Fe <sub>SA</sub> /Fe <sub>AC</sub> -NC 1000 | 90.38                   | 0.60 | 0.61 | 1.33 |

**Table S2** BET results of the as-prepared samples.

| Samples                                     | Specific surface area (m <sup>2</sup> g <sup>-1</sup> ) | Pore volume (cm <sup>3</sup> g <sup>-1</sup> ) | Pore diameter (nm) |
|---------------------------------------------|---------------------------------------------------------|------------------------------------------------|--------------------|
| C 900                                       | 772.51                                                  | 0.37                                           | 2.41               |
| Fe <sub>AC</sub> -C 900                     | 200.77                                                  | 0.39                                           | 7.75               |
| Fe <sub>SA</sub> -NC 900                    | 262.54                                                  | 0.38                                           | 7.36               |
| Fe <sub>SA</sub> /Fe <sub>AC</sub> -NC 800  | 743.70                                                  | 0.38                                           | 2.52               |
| Fe <sub>SA</sub> /Fe <sub>AC</sub> -NC 900  | 968.32                                                  | 0.52                                           | 2.36               |
| Fe <sub>SA</sub> /Fe <sub>AC</sub> -NC 1000 | 359.62                                                  | 0.40                                           | 4.84               |

**Table S3** Comparison of the element contents of various catalysts obtained from XPS analysis.

| Samples                                     | C (at.%) | N (at.%) | O (at.%) | Fe (at.%) |
|---------------------------------------------|----------|----------|----------|-----------|
| C 900                                       | 91.82    | -        | 8.18     | -         |
| Fe <sub>AC</sub> -C 900                     | 97.62    | -        | 1.93     | 0.45      |
| Fe <sub>SA</sub> -NC 900                    | 96.71    | 1.23     | 1.86     | 0.20      |
| Fe <sub>SA</sub> /Fe <sub>AC</sub> -NC 800  | 90.79    | 3.19     | 5.60     | 0.42      |
| Fe <sub>SA</sub> /Fe <sub>AC</sub> -NC 900  | 88.10    | 3.86     | 7.62     | 0.42      |
| Fe <sub>SA</sub> /Fe <sub>AC</sub> -NC 1000 | 95.24    | 1.17     | 3.21     | 0.38      |

**Table S4** Comparison of the nitrogen configurations of Fe<sub>SA</sub>/Fe<sub>AC</sub>-NC 800, Fe<sub>SA</sub>/Fe<sub>AC</sub>-NC 900 and Fe<sub>SA</sub>/Fe<sub>AC</sub>-NC 1000 catalysts.

| Samples                                     | Pyridinic-N | Fe-N <sub>x</sub> | Pyrrolic-N | Graphitic-N | Oxidized N |
|---------------------------------------------|-------------|-------------------|------------|-------------|------------|
|                                             | (%)         | (%)               | (%)        | (%)         | (%)        |
|                                             | ~398.6 eV   | ~399.4 eV         | ~400.2 eV  | ~401.2 eV   | ~403.4 eV  |
| Fe <sub>SA</sub> /Fe <sub>AC</sub> -NC 800  | 20.51       | 6.41              | 6.41       | 46.37       | 20.30      |
| Fe <sub>SA</sub> /Fe <sub>AC</sub> -NC 900  | 21.26       | 9.54              | 10.26      | 47.21       | 11.73      |
| Fe <sub>SA</sub> /Fe <sub>AC</sub> -NC 1000 | 11.41       | 9.49              | 7.55       | 53.83       | 17.72      |



**Table S5** Fe K-edge fitting parameters.

| Sample                                     | shell  | N         | R (Å) | $\Delta E_0$ (eV) | $\sigma^2$ (Å <sup>2</sup> ) | R factor |
|--------------------------------------------|--------|-----------|-------|-------------------|------------------------------|----------|
| Fe foil                                    | Fe-Fe  | 8.0       | 2.47  | 5.5               | 0.0054                       | 0.005    |
|                                            | Fe-Fe  | 6.0       | 2.85  |                   | 0.0071                       |          |
| Fe <sub>SA</sub> /Fe <sub>AC</sub> -NC 900 | Fe-N   | 4.1±0.4   | 2.01  | -0.76             | 0.0089                       | 0.016    |
|                                            | Fe-Fe1 | 0.5±0.007 | 2.50  |                   | 0.0023                       |          |
|                                            | Fe-Fe2 | 3.1±0.5   | 3.03  |                   | 0.0102                       |          |

**Table S6** The ORR performance parameters of various samples tested in alkaline media.

| Samples                                     | $E_p$<br>(V vs. RHE) | $E_{\text{onset}}$<br>(V vs. RHE) | $E_{1/2}$<br>(V vs. RHE) | $J_L$<br>(0.2 V, mA·cm <sup>-2</sup> ) |
|---------------------------------------------|----------------------|-----------------------------------|--------------------------|----------------------------------------|
| C 900                                       | 0.63                 | 0.79                              | 0.72                     | 3.29                                   |
| Fe <sub>AC</sub> -C 900                     | 0.60                 | 0.77                              | 0.66                     | 4.57                                   |
| Fe <sub>SA</sub> -NC 900                    | 0.74                 | 0.93                              | 0.83                     | 5.41                                   |
| Fe <sub>SA</sub> /Fe <sub>AC</sub> -NC 800  | 0.81                 | 0.98                              | 0.89                     | 5.65                                   |
| Fe <sub>SA</sub> /Fe <sub>AC</sub> -NC 900  | 0.82                 | 0.98                              | 0.90                     | 5.93                                   |
| Fe <sub>SA</sub> /Fe <sub>AC</sub> -NC 1000 | 0.76                 | 0.93                              | 0.85                     | 5.90                                   |
| 20% Pt/C                                    | -                    | 0.96                              | 0.86                     | 5.51                                   |

**Table S7** Summary of reported ORR activity of PGM-free catalysts. All catalysts were estimated in an O<sub>2</sub>-saturated 0.1 M KOH electrolyte.

| <b>Catalysts</b>                              | <b><math>E_{\text{onset}}</math></b><br><b>(V vs. RHE)</b> | <b><math>E_{1/2}</math></b><br><b>(V vs. RHE)</b> | <b><math>J_k</math></b><br><b>(mA cm<sup>-2</sup>)</b> | <b>Reference</b> |
|-----------------------------------------------|------------------------------------------------------------|---------------------------------------------------|--------------------------------------------------------|------------------|
| <b>Fe<sub>SA</sub>/Fe<sub>AC</sub>-NC 900</b> | <b>0.98</b>                                                | <b>0.90</b>                                       | <b>26.90 at 0.85 V</b>                                 | <b>This work</b> |
| Co/MnO@N,S-CNT/NFs                            | -                                                          | 0.84                                              | -                                                      | [1]              |
| HLM/C                                         | 0.95                                                       | 0.75                                              | -                                                      | [2]              |
| E-FeNC                                        | -                                                          | 0.875                                             | 7.95 at 0.85 V                                         | [3]              |
| Fe SACs                                       | -                                                          | 0.85                                              | -                                                      | [4]              |
| FeZ-CNS-900                                   | 0.963                                                      | 0.881                                             | 24.10 at 0.85 V                                        | [5]              |
| Mo/C tubes                                    | -                                                          | 0.81                                              | -                                                      | [6]              |
| Fe(Fc)-N/S-C                                  | 0.991                                                      | 0.872                                             | -                                                      | [7]              |
| 0.14Co0.01Fe-CB                               | -                                                          | 0.86                                              | -                                                      | [8]              |
| commercial Fe-N-C                             | -                                                          | 0.846                                             | -                                                      | [9]              |
| FeNC-SN-2                                     | 0.982                                                      | 0.890                                             | 1.99 at 0.90 V                                         | [10]             |
| Cu-N-C/GC                                     | 0.98                                                       | 0.84                                              | -                                                      | [11]             |

**Table S8** The ORR performance parameters of various samples tested in acid media.

| Samples                                     | $E_p$<br>(V vs. RHE) | $E_{\text{onset}}$<br>(V vs. RHE) | $E_{1/2}$<br>(V vs. RHE) | $J_L$<br>(0.2 V, mA·cm <sup>-2</sup> ) |
|---------------------------------------------|----------------------|-----------------------------------|--------------------------|----------------------------------------|
| C 900                                       | 0.13                 | 0.45                              | 0.31                     | 2.16                                   |
| Fe <sub>AC</sub> -C 900                     | 0.18                 | 0.61                              | 0.36                     | 3.28                                   |
| Fe <sub>SA</sub> -NC 900                    | 0.54                 | 0.80                              | 0.65                     | 5.37                                   |
| Fe <sub>SA</sub> /Fe <sub>AC</sub> -NC 800  | 0.67                 | 0.86                              | 0.78                     | 5.48                                   |
| Fe <sub>SA</sub> /Fe <sub>AC</sub> -NC 900  | 0.73                 | 0.90                              | 0.80                     | 5.61                                   |
| Fe <sub>SA</sub> /Fe <sub>AC</sub> -NC 1000 | 0.54                 | 0.80                              | 0.66                     | 5.51                                   |
| 20% Pt/C                                    | -                    | 0.93                              | 0.83                     | 5.49                                   |

**Table S9** Summary of reported ORR activity of PGM-free catalysts. All catalysts were estimated in an O<sub>2</sub>-saturated 0.1 M HClO<sub>4</sub> electrolyte.

| Catalysts                                     | $E_{\text{onset}}$<br>(V vs. RHE) | $E_{1/2}$<br>(V vs. RHE) | $J_k$<br>(mA cm <sup>-2</sup> ) | Reference        |
|-----------------------------------------------|-----------------------------------|--------------------------|---------------------------------|------------------|
| <b>Fe<sub>SA</sub>/Fe<sub>AC</sub>-NC 900</b> | <b>0.89</b>                       | <b>0.80</b>              | <b>7.48 at 0.80 V</b>           | <b>This work</b> |
| HPFe-N-C                                      | -                                 | 0.802                    | 6.713 at 0.80 V                 | [12]             |
| FeN <sub>4</sub> Cl <sub>1</sub> /NC          | -                                 | 0.79                     | 24 at 0.75 V                    | [13]             |
| Ca-N, O/C                                     | -                                 | 0.77                     | -                               | [14]             |
| Mn-N-C-OAc-10-second                          | -                                 | 0.80                     | 0.41 at 0.85 V                  | [15]             |
| D-Fe SAC                                      | -                                 | 0.78                     | -                               | [16]             |
| Fe-C-N950                                     | -                                 | 0.8                      | -                               | [17]             |
| Fe-N/P-C-700                                  | 0.89                              | 0.72                     | -                               | [18]             |
| Fe/Zn-N-C                                     | 0.985                             | 0.808                    | -                               | [19]             |
| SnNC                                          | -                                 | ~0.73                    | -                               | [20]             |
| Fe/NC-NaCl                                    | 0.960                             | 0.832                    | 15.0 at 0.85 V                  | [21]             |

**Table S10** The ORR performance parameters of samples with different Fe contents.

| Catalysts                                 | $E_{\text{onset}}$ -alkaline/acid<br>(V vs. RHE) | $E_{1/2}$ -alkaline/acid<br>(V vs. RHE) | $J_k$ -alkaline (@0.85V)<br>/acid (@0.80V)<br>(mA cm <sup>-2</sup> ) |
|-------------------------------------------|--------------------------------------------------|-----------------------------------------|----------------------------------------------------------------------|
| Fe <sub>SA</sub> /Fe <sub>AC</sub> -NC-01 | 0.94/0.82                                        | 0.85/0.70                               | 5.32/0.64                                                            |
| Fe <sub>SA</sub> /Fe <sub>AC</sub> -NC-02 | 0.96/0.86                                        | 0.87/0.77                               | 11.75/2.75                                                           |
| Fe <sub>SA</sub> /Fe <sub>AC</sub> -NC-03 | 0.98/0.89                                        | 0.90/0.80                               | 26.90/7.48                                                           |
| Fe <sub>SA</sub> /Fe <sub>AC</sub> -NC-04 | 0.98/0.89                                        | 0.89/0.79                               | 21.38/6.08                                                           |
| Fe <sub>SA</sub> /Fe <sub>AC</sub> -NC-05 | 0.97/0.88                                        | 0.88/0.78                               | 13.90/5.16                                                           |

**Table S11** Free energies of the catalyst model.

| Free<br>Energies (eV) | Catalyst                          |                     |                                       |                          |                                           |
|-----------------------|-----------------------------------|---------------------|---------------------------------------|--------------------------|-------------------------------------------|
|                       | Fe <sub>AC</sub> <sup>a)</sup> /C | Fe <sub>SA</sub> /C | Fe <sub>SA</sub> /C- Fe <sub>AC</sub> | Fe <sub>SA</sub> /C-Pore | Fe <sub>SA</sub> /C-Pore-Fe <sub>AC</sub> |
| * b)                  | -973.006                          | -280.99             | -957.98                               | -949.52                  | -1097.39                                  |
| *O                    | -979.305                          | -287.05             | -963.29                               | -954.73                  | -1103.03                                  |
| *OH                   | -983.465                          | -291.28             | -967.86                               | -959.31                  | -1107.40                                  |
| *OOH                  | -987.237                          | -295.47             | -972.12                               | -963.63                  | -1111.64                                  |

a) Fe cluster represents 13 iron atoms.

b) \* denotes the Fe atom of FeN<sub>4</sub> active center for the Fe<sub>SA</sub>/C, Fe<sub>SA</sub>/C- Fe<sub>AC</sub>, Fe<sub>SA</sub>/C-Pore, Fe<sub>SA</sub>/C-Pore-Fe<sub>AC</sub>, respectively.

**Table S12** The performance of primary Zn-air batteries using PGM-free electrocatalysts.

| Catalysts                                     | Peak power density<br>(mW cm <sup>-2</sup> ) | Durability<br>(h) | Reference        |
|-----------------------------------------------|----------------------------------------------|-------------------|------------------|
| <b>Fe<sub>SA</sub>/Fe<sub>AC</sub>-NC 900</b> | <b>214.3</b>                                 | <b>120</b>        | <b>This work</b> |
| Mo/C tubes                                    | 197                                          | 50                | [6]              |
| Fe <sub>SA</sub> -N/Cs-OAc                    | 165                                          | 60                | [22]             |
| D-Co@NC                                       | 115.4                                        | 200               | [23]             |
| OAC                                           | 113                                          | -                 | [24]             |
| 3D SAFe                                       | 156                                          | 80                | [25]             |
| CoSe <sub>2</sub> @NC                         | 137.1                                        | 166.7             | [26]             |
| Fe,Mn/N-C                                     | 160.8                                        | 81                | [27]             |
| FeN <sub>4</sub> -Te <sub>n</sub>             | 183                                          | 20                | [28]             |
| Fe <sub>0.5</sub> Co@HOMNCP                   | 134                                          | 120               | [29]             |
| pI-S-40                                       | 148.5                                        | 100               | [30]             |
| SAC-FeN-WPC                                   | 152                                          | 80                | [31]             |
| BTC-Co-O-Cu-BTA                               | 200                                          | 50                | [32]             |
| I/CNT                                         | 132.9                                        | ~33.3             | [33]             |
| Sb SAC                                        | 184.6                                        | -                 | [34]             |
| Co@DMOF-900                                   | 158                                          | 200               | [35]             |
| Co@NCW                                        | 47.5                                         | 240               | [36]             |
| SAs-Fe/N-CNSs                                 | 157.03                                       | -                 | [37]             |
| CNT@SAC-Co/NCP                                | 172                                          | 210               | [38]             |
| N-CoS <sub>2</sub> YSSs                       | 81                                           | 165               | [39]             |
| C <sub>PANI-TA-Fe</sub> Fe-SA-NC              | ~136.4                                       | 180               | [40]             |



## Section 2. References

- 1 Q. Zhou, S. Hou, Y. Cheng, R. Sun, W. Shen, R. Tian, J. Yang, H. Pang, L. Xu, K. Huang, Y. Tanga, *Appl. Catal. B: Environ.*, 2021, **295**, 120281.
- 2 X. Zhong, M. Oubla, X. Wang, Y. Huang, H. Zeng, S. Wang, K. Liu, J. Zhou, L. He, H. Zhong, N. Alonso-Vante, C.-W. Wang, W.-B. Wu, H.-J. Lin, C.-T. Chen, Z. Hu, Y. Huang, J. Ma, *Nat. Commun.*, 2021, **12** 3136.
- 3 R. Ma, G. Lin, Q. Ju, W. Tang, G. Chen, Z. Chen, Q. Liu, M. Yang, Y. Lu, J. Wang, *Appl. Catal. B: Environ.*, 2020, **265**, 118593.
- 4 Z. Jin, P. Li, Y. Meng, Z. Fang, D. Xiao, G. Yu, *Nat. Catal.*, 2021, **4**, 615.
- 5 G. Li, L. Pei, Y. Wu, B. Zhu, Q. Hu, H. Yang, Q. Zhang, J. Liu, C. He, *J. Mater. Chem. A*, 2019, **7**, 11223–11233.
- 6 Y. Zhao, Z. Zhang, L. Liu, Y. Wang, T. Wu, W. Qin, S. Liu, B. Jia, H. Wu, D. Zhang, X. Qu, G. Qi, E. P. Giannelis, M. Qin, S. Guo, *J. Am. Chem. Soc.*, 2022, **144** 20571–20581.
- 7 X. Li, X. Yang, L. Liu, H. Zhao, Y. Li, H. Zhu, Y. Chen, S. Guo, Y. Liu, Q. Tan, G. Wu, *ACS Catal.*, 2021, **11**, 7450-7459.
- 8 W. Zhu, Y. Pei, J. C. Douglin, J. Zhang, H. Zhao, J. Xue, Q. Wang, R. Li, Y. Qin, Y. Yin, D. R. Dekel, M. D. Guiver, *Appl. Catal. B: Environ.*, 2021, **299**, 120656.
- 9 H. Adabi, A. Shakouri, N. U. Hassan, J. R. Varcoe, B. Zulevi, A. Serov, J. R. Regalbuto, W. E. Mustain, *Nat. Energy*, 2021, **6**, 834-843.
- 10 C. Shao, L. Wu, H. Zhang, Q. Jiang, X. Xu, Y. Wang, S. Zhuang, H. Chu, L. Sun, J. Ye, B. Li, X. Wang, *Adv. Funct. Mater.*, 2021, **31**, 2100833.
- 11 G. Xing, M. Tong, P. Yu, L. Wang, G. Zhang, C. Tian, H. Fu, *Angew. Chem. Int. Ed.*, 2022, **61**, e202211098.

- 12 H. Xu, D. Wang, P. Yang, L. Du, X. Lu, R. Li, L. Liu, J. Zhang, M. An, *Appl. Catal. B: Environ.*, 2022, **305**, 121040.
- 13 L. Hu, C. Dai, L. Chen, Y. Zhu, Y. Hao, Q. Zhang, L. Gu, X. Feng, S. Yuan, L. Wang, B. Wang, *Angew. Chem. Int. Ed.*, 2021, **60**, 27324–27329.
- 14 Z. Lin, H. Huang, L. Cheng, W. Hu, P. Xu, Y. Yang, J. Li, F. Gao, K. Yang, S. Liu, P. Jiang, W. Yan, S. Chen, C. Wang, H. Tong, M. Huang, W. Zheng, H. Wang, Q. Chen, *Adv. Mater.*, 2021, **33**, 2107103.
- 15 Z. Kong, T. Liu, K. Hou, L. Guan, *J. Mater. Chem. A*, 2022, **10**, 2826–2834.
- 16 J. Yang, Z. Wang, C. Huang, Y. Zhang, Q. Zhang, C. Chen, J. Du, X. Zhou, Y. Zhang, H. Zhou, L. Wang, X. Zheng, L. Gu, L. Yang, Y. Wu, *Angew. Chem. Int. Ed.*, 2021, **60**, 22722–22728.
- 17 T. Al-Zoubi, Y. Zhou, X. Yin, B. Janicek, C. Sun, C. E. Schulz, X. Zhang, A. A. Gewirth, P. Huang, P. Zelenay, H. Yang, *J. Am. Chem. Soc.*, 2020, **142**, 5477–5481.
- 18 K. Yuan, D. Lützenkirchen-Hecht, L. Li, L. Shuai, Y. Li, R. Cao, M. Qiu, X. Zhuang, M. K. H. Leung, Y. Chen, U. Scherf, *J. Am. Chem. Soc.*, 2020, **142**, 2404–2412.
- 19 H. Li, S. Di, P. Niu, S. Wang, J. Wang, L. Li, *Energy Environ. Sci.*, 2022, **15**, 1601–1610.
- 20 F. Luo, A. Roy, L. Silvioli, D. A. Cullen, A. Zitolo, M. T. Sougrati, I. C. Oguz, T. Mineva, D. Teschner, S. Wagner, J. Wen, F. Dionigi, U. I. Kramm, J. Rossmeisl, F. Jaouen, P. Strasser, *Nat. Mater.*, 2020, **19**, 1215–1223.
- 21 Q. Wang, Y. Yang, F. Sun, G. Chen, J. Wang, L. Peng, Wan. Chen, L. Shang, J. Zhao, D. Sun-Waterhouse, T. Zhang, G. I. N. Waterhouse, *Adv. Energy Mater.*, 2021, **11**, 2100219.
- 22 F. Kong, Y. Huang, M. Chen, G. Meng, H. Tian, Y. Chen, Z. Chang, C. Chen, W. Sun, X. Cui, J. Shi, *Appl. Catal. B: Environ.*, 2022, **317**, 120281.
- 23 F. Zhang, L. Chen, H. Yang, Y. Zhang, Y. Peng, X. Luo, A. Ahmad, N. Ramzan, Y. Xu, Y. Shi, *Chem. Eng. J.*, 2022, **431**, 133734.
- 24 L. Deng, L. Qiu, R. Hu, L. Yao, Z. Zheng, X. Ren, Y. Li, C. He, *Appl. Catal. B: Environ.*, 2022, **305**,

121058.

- 25 Y. Jiao, X. Gu, P. Zhai, Y. Wei, W. Liu, Q. Chen, Z. Yang, J. Zuo, L. Wang, T. Xu, Y. Gong, *Nano Lett.*, 2022, **22**, 7386–7393.
- 26 K. Ding, J. Hu, J. Luo, W. Jin, L. Zhao, L. Zheng, W. Yan, B. Weng, H. Hou, X. Ji, *Nano Energy*, 2022, **91**, 106675.
- 27 G. Yang, J. Zhu, P. Yuan, Y. Hu, G. Qu, B.-A. Lu, X. Xue, H. Yin, W. Cheng, J. Cheng, W. Xu, J. Li, J. Hu, S. Mu, J.-N. Zhang, *Nat. Commun.*, 2021, **12**, 1734.
- 28 B. Ji, J. Gou, Y. Zheng, X. Zhou, P. Kidkhunthod, Y. Wang, Q. Tang, Y. Tang, *Adv. Mater.*, 2022, **34**, 2202714.
- 29 W. Li, B. Liu, D. Liu, P. Guo, J. Liu, R. Wang, Y. Guo, X. Tu, H. Pan, D. Sun, F. Fang, R. Wu, *Adv. Mater.*, 2022, **34**, 2109605.
- 30 Z. Shao, Q. Zhu, Y. Sun, Y. Zhang, Y. Jiang, S. Deng, W. Zhang, K. Huang, S. Feng, *Adv. Mater.*, 2022, **34**, 2110172.
- 31 L. Zhong, C. Jiang, M. Zheng, X. Peng, T. Liu, S. Xi, X. Chi, Q. Zhang, L. Gu, S. Zhang, G. Shi, L. Zhang, K. Wu, Z. Chen, T. Li, M. Dahbi, J. Alami, K. Amine, J. Lu, *ACS Energy Lett.*, 2021, **6**, 3624–3633.
- 32 M. F. Sanad, A.R. Puente Santiago, S.A. Tolba, M.A. Ahsan, O. Fernandez-Delgado, M. Shawky Adly, E.M. Hashem, M. Mahrous Abodouh, M.S. El-Shall, S.T. Sreenivasan, N.K. Allam, L. Echegoyen, *J. Am. Chem. Soc.*, 2021, **143**, 4064-4073.
- 33 L. Xie, X. P. Zhang, B. Zhao, P. Li, J. Qi, X. Guo, B. Wang, H. Lei, W. Zhang, U.P. Apfel, R. Cao, *Angew. Chem. Int. Ed.*, 2021, **60**, 7576-7581.
- 34 T. Wang, X. Cao, H. Qin, L. Shang, S. Zheng, F. Fang, L. Jiao, *Angew. Chem. Int. Ed.*, 2021, **60**, 21237-21241.
- 35 S. Yuan, J. Zhang, L. Hu, J. Li, S. Li, Y. Gao, Q. Zhang, L. Gu, W. Yang, X. Feng, B. Wang, *Angew.*

- Chem. Int. Ed.*, 2021, **60**, 21685–21690.
- 36 W. Li, F. Wang, Z. Zhang, S. Min, *Appl. Catal. B: Environ.*, 2022, **137**, 121758.
- 37 X.-F. Gong, Y.-L. Zhang, L. Zhao, Y.-K. Dai, J.-J. Cai, B. Liu, P. Guo, Q.-Y. Zhou, I. Yagi, Z.-B. Wang, *J. Mater. Chem. A*, 2022, **10**, 5971–5980.
- 38 J.-C. Li, Y. Meng, L. Zhang, G. Li, Z. Shi, P.-X. Hou, C. Liu, H.-M. Cheng, M. Shao, *Adv. Funct. Mater.*, 2021, **31**, 2103360.
- 39 X. F. Lu, S. L. Zhang, E. Shanguan, P. Zhang, S. Gao, X. W. (David) Lou, *Adv. Sci.*, 2020, **7**, 2001178.
- 40 H. Li, K. Du, C. Xiang, P. An, X. Shu, Y. Dang, C. Wu, J. Wang, W. Du, J. Zhang, S. Li, H. Tian, S. Wang, H. Xia, *J. Mater. Chem. A*, 2020, **8**, 17136–17149.
